# Supplementary material for: Genome-scale Transcriptomic Insights Into the Gene-regulatory Network of Seed Abortion in Triploid Siraitia Grosvenorii
Source: Research Square preprint supplement (doi:10.21203/rs.3.rs-966900/v1), 2021-10-26
Supplement: Supplementary file 1 [file 3198fdb12773ff9c103bd9e8.xls]

Table S2. GO functional enrichment of DEGs (15DAF vs 10DAF).
class	ID	Descrption	Pvalue	Qvalue	Up	Down	fg_num	bg_num
Biological Process	GO:0006259	DNA metabolic process	1.14E-19	1.32E-16	3	101	104	313
Biological Process	GO:0006260	DNA replication	4.63E-14	2.68E-11	2	36	38	77
Biological Process	GO:0009892	negative regulation of metabolic process	1.72E-10	6.64E-08	5	51	56	174
Biological Process	GO:0007049	cell cycle	3.56E-10	1.03E-07	4	61	65	220
Biological Process	GO:0051052	regulation of DNA metabolic process	7.86E-10	1.66E-07	0	18	18	28
Biological Process	GO:0048519	negative regulation of biological process	8.58E-10	1.66E-07	5	54	59	195
Biological Process	GO:0010605	negative regulation of macromolecule metabolic process	6.91E-09	1.14E-06	2	43	45	138
Biological Process	GO:0010629	negative regulation of gene expression	9.24E-09	1.34E-06	2	41	43	130
Biological Process	GO:0022402	cell cycle process	1.21E-08	1.56E-06	2	47	49	159
Biological Process	GO:0016569	covalent chromatin modification	1.55E-08	1.79E-06	3	40	43	132
Biological Process	GO:0043414	macromolecule methylation	2.00E-08	2.10E-06	1	36	37	106
Biological Process	GO:0034968	histone lysine methylation	2.41E-08	2.33E-06	1	25	26	61
Biological Process	GO:0018022	peptidyl-lysine methylation	5.38E-08	4.80E-06	1	25	26	63
Biological Process	GO:0006325	chromatin organization	5.99E-08	4.96E-06	5	48	53	186
Biological Process	GO:0032259	methylation	7.76E-08	5.99E-06	1	38	39	120
Biological Process	GO:0016568	chromatin modification	8.93E-08	6.46E-06	3	41	44	144
Biological Process	GO:0051276	chromosome organization	1.05E-07	7.15E-06	5	57	62	235
Biological Process	GO:0016571	histone methylation	1.22E-07	7.83E-06	1	30	31	86
Biological Process	GO:0005976	polysaccharide metabolic process	1.78E-07	1.09E-05	39	42	81	341
Biological Process	GO:0006479	protein methylation	2.97E-07	1.64E-05	1	30	31	89
Biological Process	GO:0008213	protein alkylation	2.97E-07	1.64E-05	1	30	31	89
Biological Process	GO:0016570	histone modification	3.31E-07	1.74E-05	3	36	39	126
Biological Process	GO:0016458	gene silencing	7.77E-07	3.91E-05	2	36	38	125
Cellular Component	GO:0015630	microtubule cytoskeleton	3.58E-07	4.83E-05	6	29	35	112
Cellular Component	GO:0044430	cytoskeletal part	7.21E-07	4.87E-05	2	24	26	73
Biological Process	GO:1903047	mitotic cell cycle process	1.21E-06	5.86E-05	0	26	26	72
Biological Process	GO:0000278	mitotic cell cycle	1.32E-06	6.12E-05	0	28	28	81
Biological Process	GO:0050789	regulation of biological process	1.82E-06	8.09E-05	87	195	282	1634
Biological Process	GO:0042546	cell wall biogenesis	2.08E-06	8.94E-05	10	8	18	41
Biological Process	GO:0051301	cell division	2.26E-06	9.35E-05	2	28	30	92
Biological Process	GO:0006305	DNA alkylation	4.87E-06	0.000191424	0	19	19	47
Biological Process	GO:0006725	cellular aromatic compound metabolic process	4.96E-06	0.000191424	59	197	256	1478
Biological Process	GO:0044550	secondary metabolite biosynthetic process	6.61E-06	0.0002471	18	6	24	69
Biological Process	GO:0006304	DNA modification	7.04E-06	0.000254914	0	19	19	48
Cellular Component	GO:0005856	cytoskeleton	6.67E-06	0.000300118	8	30	38	141
Biological Process	GO:0009699	phenylpropanoid biosynthetic process	1.03E-05	0.000359991	15	2	17	41
Biological Process	GO:0010383	cell wall polysaccharide metabolic process	1.65E-05	0.000531684	20	1	21	59
Biological Process	GO:0010410	hemicellulose metabolic process	1.65E-05	0.000531684	20	1	21	59
Biological Process	GO:0045491	xylan metabolic process	1.65E-05	0.000531684	20	1	21	59
Cellular Component	GO:0071944	cell periphery	1.93E-05	0.000652681	16	33	49	208
Biological Process	GO:0018205	peptidyl-lysine modification	2.52E-05	0.000789381	2	25	27	88
Biological Process	GO:0009698	phenylpropanoid metabolic process	3.70E-05	0.001127592	16	3	19	53
Biological Process	GO:0032508	DNA duplex unwinding	3.92E-05	0.001149069	0	6	6	7
Biological Process	GO:0018193	peptidyl-amino acid modification	4.07E-05	0.001149069	3	25	28	95
Biological Process	GO:0050790	regulation of catalytic activity	4.07E-05	0.001149069	9	19	28	95
Biological Process	GO:0019748	secondary metabolic process	4.30E-05	0.001184331	23	15	38	146
Biological Process	GO:0071554	cell wall organization or biogenesis	5.11E-05	0.001375739	28	20	48	201
Biological Process	GO:0065007	biological regulation	5.25E-05	0.001381346	97	201	298	1810
Biological Process	GO:0019222	regulation of metabolic process	5.60E-05	0.001440213	56	122	178	1005
Biological Process	GO:0051726	regulation of cell cycle	5.87E-05	0.001476749	1	19	20	59
Biological Process	GO:1901360	organic cyclic compound metabolic process	6.94E-05	0.001709315	59	195	254	1516
Biological Process	GO:0009791	post-embryonic development	8.40E-05	0.00202558	13	61	74	355
Biological Process	GO:0061640	cytoskeleton-dependent cytokinesis	8.81E-05	0.002082863	0	19	19	56
Biological Process	GO:0090304	nucleic acid metabolic process	0.000105626	0.002444274	25	156	181	1036
Biological Process	GO:0065009	regulation of molecular function	0.000108145	0.002444274	9	21	30	110
Biological Process	GO:0007275	multicellular organism development	0.00010976	0.002444274	25	104	129	699
Cellular Component	GO:0030312	external encapsulating structure	0.000114615	0.002874979	15	28	43	187
Cellular Component	GO:0044427	chromosomal part	0.000127777	0.002874979	0	10	10	21
Biological Process	GO:0000281	mitotic cytokinesis	0.000132521	0.002895464	0	18	18	53
Biological Process	GO:0044036	cell wall macromolecule metabolic process	0.00014887	0.003192429	21	1	22	72
Cellular Component	GO:0005576	extracellular region	0.000215295	0.004152125	19	14	33	135
Biological Process	GO:0006558	L-phenylalanine metabolic process	0.000204535	0.004229488	11	0	11	25
Biological Process	GO:1902221	erythrose 4-phosphate/phosphoenolpyruvate family amino acid metabolic process	0.000204535	0.004229488	11	0	11	25
Biological Process	GO:0007017	microtubule-based process	0.000238726	0.004849903	0	26	26	94
Biological Process	GO:0005975	carbohydrate metabolic process	0.000252654	0.005044368	55	56	111	597
Biological Process	GO:0006139	nucleobase-containing compound metabolic process	0.000283823	0.005570625	31	178	209	1242
Biological Process	GO:1902410	mitotic cytokinetic process	0.000340271	0.006567221	0	17	17	52
Biological Process	GO:0009832	plant-type cell wall biogenesis	0.00036295	0.006890103	6	1	7	12
Biological Process	GO:0000910	cytokinesis	0.000396933	0.007413688	0	19	19	62
Biological Process	GO:0009620	response to fungus	0.000414317	0.007615538	8	12	20	67
Biological Process	GO:0040029	regulation of gene expression, epigenetic	0.000426966	0.007725416	1	23	24	87
Molecular Function	GO:0016841	ammonia-lyase activity	3.23E-05	0.007748934	10	0	10	18
Molecular Function	GO:0004386	helicase activity	4.59E-05	0.007748934	0	15	15	37
Biological Process	GO:0071103	DNA conformation change	0.000447754	0.00797691	0	12	12	31
Cellular Component	GO:0005886	plasma membrane	0.000543749	0.009023395	1	6	7	13
Cellular Component	GO:0005694	chromosome	0.00060156	0.009023395	0	12	12	33
Biological Process	GO:0044707	single-multicellular organism process	0.000544328	0.009550478	30	107	137	777
Biological Process	GO:0009886	post-embryonic morphogenesis	0.000618245	0.01068548	0	19	19	64
Biological Process	GO:0046483	heterocycle metabolic process	0.000688799	0.0115687	39	187	226	1377
Biological Process	GO:0019220	regulation of phosphate metabolic process	0.000709307	0.0115687	6	11	17	55
Biological Process	GO:0031324	negative regulation of cellular metabolic process	0.000709307	0.0115687	1	16	17	55
Biological Process	GO:0051174	regulation of phosphorus metabolic process	0.000709307	0.0115687	6	11	17	55
Biological Process	GO:0032501	multicellular organismal process	0.000757131	0.012177196	30	107	137	783
Cellular Component	GO:0043228	non-membrane-bounded organelle	0.001028531	0.012622883	11	62	73	395
Cellular Component	GO:0043232	intracellular non-membrane-bounded organelle	0.001028531	0.012622883	11	62	73	395
Biological Process	GO:0044238	primary metabolic process	0.000818309	0.012980845	201	384	585	3931
Biological Process	GO:0048444	floral organ morphogenesis	0.000899796	0.013710051	0	8	8	17
Biological Process	GO:0048449	floral organ formation	0.000899796	0.013710051	0	8	8	17
Biological Process	GO:0048563	post-embryonic organ morphogenesis	0.000899796	0.013710051	0	8	8	17
Biological Process	GO:0044767	single-organism developmental process	0.00097287	0.014630948	30	116	146	847
Biological Process	GO:0071229	cellular response to acid chemical	0.001063262	0.015462504	11	12	23	87
Biological Process	GO:0001932	regulation of protein phosphorylation	0.00106597	0.015462504	6	10	16	52
Biological Process	GO:1901701	cellular response to oxygen-containing compound	0.001068221	0.015462504	12	17	29	119
Biological Process	GO:0032506	cytokinetic process	0.001112142	0.01589951	0	17	17	57
Biological Process	GO:0006342	chromatin silencing	0.00117025	0.016327108	1	13	14	43
Biological Process	GO:0045814	negative regulation of gene expression, epigenetic	0.00117025	0.016327108	1	13	14	43
Cellular Component	GO:0044459	plasma membrane part	0.001524619	0.017151969	1	4	5	8
Biological Process	GO:0006807	nitrogen compound metabolic process	0.001251258	0.017249489	69	211	280	1764
Biological Process	GO:0060255	regulation of macromolecule metabolic process	0.001296591	0.017664147	43	97	140	813
Biological Process	GO:0042325	regulation of phosphorylation	0.001337363	0.018007747	6	10	16	53
Biological Process	GO:0048285	organelle fission	0.001394115	0.018556149	0	18	18	63
Biological Process	GO:0034641	cellular nitrogen compound metabolic process	0.001414201	0.018609598	43	195	238	1477
Biological Process	GO:0032269	negative regulation of cellular protein metabolic process	0.001530279	0.019689585	0	4	4	5
Biological Process	GO:0051248	negative regulation of protein metabolic process	0.001530279	0.019689585	0	4	4	5
Biological Process	GO:0019219	regulation of nucleobase-containing compound metabolic process	0.001702505	0.021664839	9	43	52	256
Molecular Function	GO:0004553	hydrolase activity, hydrolyzing O-glycosyl compounds	0.000299474	0.022273245	14	27	41	176
Molecular Function	GO:0017111	nucleoside-triphosphatase activity	0.000316015	0.022273245	9	85	94	494
Molecular Function	GO:0016829	lyase activity	0.000329486	0.022273245	25	18	43	188
Biological Process	GO:0031399	regulation of protein modification process	0.00182196	0.022932932	8	17	25	101
Biological Process	GO:0045892	negative regulation of transcription, DNA-templated	0.001915487	0.023304673	1	13	14	45
Biological Process	GO:1903507	negative regulation of nucleic acid-templated transcription	0.001915487	0.023304673	1	13	14	45
Biological Process	GO:2000113	negative regulation of cellular macromolecule biosynthetic process	0.001915487	0.023304673	1	13	14	45
Biological Process	GO:0080090	regulation of primary metabolic process	0.001931994	0.023304673	19	58	77	412
Biological Process	GO:0010564	regulation of cell cycle process	0.001980394	0.023483999	0	10	10	27
Biological Process	GO:0043549	regulation of kinase activity	0.002007699	0.023483999	6	9	15	50
Biological Process	GO:0045859	regulation of protein kinase activity	0.002007699	0.023483999	6	9	15	50
Biological Process	GO:0000280	nuclear division	0.002070156	0.02397241	0	17	17	60
Molecular Function	GO:0016840	carbon-nitrogen lyase activity	0.000667736	0.02780297	10	0	10	24
Molecular Function	GO:0016818	hydrolase activity, acting on acid anhydrides, in phosphorus-containing anhydrides	0.000668093	0.02780297	10	88	98	530
Molecular Function	GO:0019887	protein kinase regulator activity	0.000764671	0.02780297	1	4	5	7
Molecular Function	GO:0016758	transferase activity, transferring hexosyl groups	0.000855613	0.02780297	20	20	40	179
Molecular Function	GO:0015631	tubulin binding	0.000921074	0.02780297	1	19	20	71
Molecular Function	GO:0016462	pyrophosphatase activity	0.000949116	0.02780297	10	87	97	529
Molecular Function	GO:0016817	hydrolase activity, acting on acid anhydrides	0.000987088	0.02780297	10	88	98	536
Biological Process	GO:0009411	response to UV	0.002474001	0.028119729	5	13	18	66
Biological Process	GO:0051338	regulation of transferase activity	0.002493125	0.028119729	6	9	15	51
Biological Process	GO:0002832	negative regulation of response to biotic stimulus	0.002525433	0.028119729	0	3	3	3
Biological Process	GO:0010413	glucuronoxylan metabolic process	0.002525433	0.028119729	3	0	3	3
Biological Process	GO:0012501	programmed cell death	0.002634442	0.028755541	13	8	21	82
Biological Process	GO:0044042	glucan metabolic process	0.002681709	0.028755541	14	31	45	219
Biological Process	GO:0050793	regulation of developmental process	0.00268295	0.028755541	4	43	47	231
Biological Process	GO:0000272	polysaccharide catabolic process	0.002689376	0.028755541	4	8	12	37
Biological Process	GO:1902589	single-organism organelle organization	0.002716006	0.028755541	7	50	57	292
Biological Process	GO:0010941	regulation of cell death	0.00275636	0.028755541	12	8	20	77
Biological Process	GO:0043067	regulation of programmed cell death	0.00275636	0.028755541	12	8	20	77
Biological Process	GO:0010604	positive regulation of macromolecule metabolic process	0.002894219	0.028892291	5	8	13	42
Biological Process	GO:0031401	positive regulation of protein modification process	0.002894219	0.028892291	5	8	13	42
Biological Process	GO:0032270	positive regulation of cellular protein metabolic process	0.002894219	0.028892291	5	8	13	42
Biological Process	GO:0043648	dicarboxylic acid metabolic process	0.002894219	0.028892291	6	7	13	42
Biological Process	GO:0051247	positive regulation of protein metabolic process	0.002894219	0.028892291	5	8	13	42
Biological Process	GO:0043085	positive regulation of catalytic activity	0.00301666	0.029604176	5	9	14	47
Biological Process	GO:0044093	positive regulation of molecular function	0.00301666	0.029604176	5	9	14	47
Biological Process	GO:0048522	positive regulation of cellular process	0.003073198	0.029905576	8	8	16	57
Molecular Function	GO:0015926	glucosidase activity	0.001150314	0.029908176	6	8	14	43
Biological Process	GO:0051239	regulation of multicellular organismal process	0.003215095	0.030769254	4	39	43	209
Biological Process	GO:2000026	regulation of multicellular organismal development	0.003215095	0.030769254	4	39	43	209
Biological Process	GO:0016052	carbohydrate catabolic process	0.003452394	0.032769447	4	8	12	38
Biological Process	GO:0009072	aromatic amino acid family metabolic process	0.003638934	0.034053611	12	5	17	63
Biological Process	GO:0043650	dicarboxylic acid biosynthetic process	0.003646501	0.034053611	3	2	5	9
Biological Process	GO:0010558	negative regulation of macromolecule biosynthetic process	0.003736014	0.034335751	1	13	14	48
Biological Process	GO:1902679	negative regulation of RNA biosynthetic process	0.003736014	0.034335751	1	13	14	48
Molecular Function	GO:0008168	methyltransferase activity	0.001530767	0.035996717	11	14	25	100
Molecular Function	GO:0016798	hydrolase activity, acting on glycosyl bonds	0.001797725	0.035996717	15	34	49	239
Molecular Function	GO:0019187	beta-1,4-mannosyltransferase activity	0.001810486	0.035996717	1	4	5	8
Molecular Function	GO:0019207	kinase regulator activity	0.001810486	0.035996717	1	4	5	8
Biological Process	GO:0019684	photosynthesis, light reaction	0.004091553	0.036753906	0	11	11	34
Biological Process	GO:0010769	regulation of cell morphogenesis involved in differentiation	0.004094347	0.036753906	0	4	4	6
Biological Process	GO:0060284	regulation of cell development	0.004094347	0.036753906	0	4	4	6
Biological Process	GO:0050794	regulation of cellular process	0.004219062	0.037582102	54	117	171	1047
Biological Process	GO:1901576	organic substance biosynthetic process	0.004452001	0.038963756	89	161	250	1592
Biological Process	GO:0009890	negative regulation of biosynthetic process	0.004589013	0.038963756	1	13	14	49
Biological Process	GO:0031327	negative regulation of cellular biosynthetic process	0.004589013	0.038963756	1	13	14	49
Biological Process	GO:0044770	cell cycle phase transition	0.004609702	0.038963756	0	6	6	13
Biological Process	GO:0044772	mitotic cell cycle phase transition	0.004609702	0.038963756	0	6	6	13
Biological Process	GO:1901987	regulation of cell cycle phase transition	0.004609702	0.038963756	0	6	6	13
Biological Process	GO:1901990	regulation of mitotic cell cycle phase transition	0.004609702	0.038963756	0	6	6	13
Biological Process	GO:0008219	cell death	0.004840283	0.040616285	13	8	21	86
Biological Process	GO:0048569	post-embryonic organ development	0.005246765	0.043710456	0	11	11	35
Biological Process	GO:0032147	activation of protein kinase activity	0.005498813	0.04405802	5	7	12	40
Biological Process	GO:0033674	positive regulation of kinase activity	0.005498813	0.04405802	5	7	12	40
Biological Process	GO:0045860	positive regulation of protein kinase activity	0.005498813	0.04405802	5	7	12	40
Biological Process	GO:0051347	positive regulation of transferase activity	0.005498813	0.04405802	5	7	12	40
Biological Process	GO:0009767	photosynthetic electron transport chain	0.005566852	0.04405802	0	9	9	26
Biological Process	GO:0045934	negative regulation of nucleobase-containing compound metabolic process	0.005592857	0.04405802	1	13	14	50
Biological Process	GO:0051172	negative regulation of nitrogen compound metabolic process	0.005592857	0.04405802	1	13	14	50
Biological Process	GO:0051253	negative regulation of RNA metabolic process	0.005592857	0.04405802	1	13	14	50
Biological Process	GO:0048509	regulation of meristem development	0.005967032	0.046687996	2	18	20	82
Biological Process	GO:0044763	single-organism cellular process	0.006385577	0.049627506	146	319	465	3132
Biological Process	GO:0009893	positive regulation of metabolic process	0.00662869	0.05117349	9	15	24	105
Biological Process	GO:0001934	positive regulation of protein phosphorylation	0.006831955	0.051192405	5	7	12	41
Biological Process	GO:0010562	positive regulation of phosphorus metabolic process	0.006831955	0.051192405	5	7	12	41
Biological Process	GO:0042327	positive regulation of phosphorylation	0.006831955	0.051192405	5	7	12	41
Biological Process	GO:0045937	positive regulation of phosphate metabolic process	0.006831955	0.051192405	5	7	12	41
Biological Process	GO:0001101	response to acid chemical	0.006852179	0.051192405	23	23	46	236
Biological Process	GO:0048523	negative regulation of cellular process	0.007139208	0.052994893	1	16	17	67
Biological Process	GO:0031323	regulation of cellular metabolic process	0.007476901	0.055148099	21	57	78	440
Molecular Function	GO:0016701	oxidoreductase activity, acting on single donors with incorporation of molecular oxygen	0.003105319	0.058310992	6	5	11	33
Molecular Function	GO:1901363	heterocyclic compound binding	0.00328026	0.058354098	89	261	350	2289
Biological Process	GO:0031325	positive regulation of cellular metabolic process	0.008326645	0.060199027	5	8	13	47
Biological Process	GO:0009914	hormone transport	0.00840705	0.060199027	2	10	12	42
Biological Process	GO:0060918	auxin transport	0.00840705	0.060199027	2	10	12	42
Biological Process	GO:0006091	generation of precursor metabolites and energy	0.008503486	0.060199027	9	20	29	136
Biological Process	GO:0006323	DNA packaging	0.008525596	0.060199027	0	4	4	7
Biological Process	GO:0006333	chromatin assembly or disassembly	0.008525596	0.060199027	0	4	4	7
Biological Process	GO:0031497	chromatin assembly	0.008525596	0.060199027	0	4	4	7
Molecular Function	GO:0003774	motor activity	0.003586196	0.06060671	0	13	13	43
Biological Process	GO:0009987	cellular process	0.008718548	0.061188353	290	528	818	5754
Cellular Component	GO:0005875	microtubule associated complex	0.005965365	0.06194802	0	13	13	47
Biological Process	GO:0006306	DNA methylation	0.009071602	0.062159261	0	3	3	4
Biological Process	GO:0016117	carotenoid biosynthetic process	0.009071602	0.062159261	0	3	3	4
Biological Process	GO:0019682	glyceraldehyde-3-phosphate metabolic process	0.009071602	0.062159261	1	2	3	4
Biological Process	GO:0044728	DNA methylation or demethylation	0.009071602	0.062159261	0	3	3	4
Biological Process	GO:0008152	metabolic process	0.009421897	0.06383191	345	563	908	6444
Biological Process	GO:0048518	positive regulation of biological process	0.009425956	0.06383191	12	17	29	137
Molecular Function	GO:0008171	O-methyltransferase activity	0.004068149	0.065477824	3	1	4	6
Biological Process	GO:0016265	death	0.009979753	0.06718927	14	8	22	97
Biological Process	GO:0032535	regulation of cellular component size	0.010104058	0.067244248	5	5	10	33
Biological Process	GO:0090066	regulation of anatomical structure size	0.010104058	0.067244248	5	5	10	33
Biological Process	GO:0009751	response to salicylic acid	0.010251867	0.067774642	6	6	12	43
Biological Process	GO:0051336	regulation of hydrolase activity	0.010300809	0.067774642	3	8	11	38
Biological Process	GO:0048856	anatomical structure development	0.010396421	0.068017265	24	87	111	664
Biological Process	GO:0022604	regulation of cell morphogenesis	0.010561235	0.06870736	0	5	5	11
Cellular Component	GO:0000785	chromatin	0.007407232	0.071426879	0	4	4	7
Biological Process	GO:0032392	DNA geometric change	0.011326606	0.073274914	0	8	8	24
Biological Process	GO:0071840	cellular component organization or biogenesis	0.011761623	0.075666442	52	141	193	1226
Molecular Function	GO:0097159	organic cyclic compound binding	0.005248544	0.080636726	90	268	358	2362
Molecular Function	GO:0016703	oxidoreductase activity, acting on single donors with incorporation of molecular oxygen, incorporation of one atom of oxygen (internal monooxygenases or internal mixed function oxidases)	0.006431805	0.090739205	3	2	5	10
Molecular Function	GO:0016741	transferase activity, transferring one-carbon groups	0.00644302	0.090739205	14	20	34	163
Molecular Function	GO:0000030	mannosyltransferase activity	0.007087084	0.095817374	1	5	6	14
Biological Process	GO:0015979	photosynthesis	0.015330131	0.097247458	0	11	11	40
Biological Process	GO:0006281	DNA repair	0.016029443	0.097247458	0	16	16	67
Biological Process	GO:1901605	alpha-amino acid metabolic process	0.016096475	0.097247458	20	15	35	179
Biological Process	GO:0002831	regulation of response to biotic stimulus	0.016103182	0.097247458	0	5	5	12
Biological Process	GO:0009926	auxin polar transport	0.016103182	0.097247458	0	5	5	12
Biological Process	GO:0022603	regulation of anatomical structure morphogenesis	0.016103182	0.097247458	0	5	5	12
Biological Process	GO:0044699	single-organism process	0.017518988	0.097247458	224	431	655	4565
Biological Process	GO:0000725	recombinational repair	0.017533095	0.097247458	0	7	7	21
Biological Process	GO:0019438	aromatic compound biosynthetic process	0.01789386	0.097247458	40	47	87	516
Biological Process	GO:0045229	external encapsulating structure organization	0.018179203	0.097247458	20	25	45	243
Biological Process	GO:0009863	salicylic acid mediated signaling pathway	0.018446129	0.097247458	5	6	11	41
Biological Process	GO:0071446	cellular response to salicylic acid stimulus	0.018446129	0.097247458	5	6	11	41
Biological Process	GO:0006063	uronic acid metabolic process	0.018559316	0.097247458	2	0	2	2
Biological Process	GO:0006278	RNA-dependent DNA replication	0.018559316	0.097247458	0	2	2	2
Biological Process	GO:0008105	asymmetric protein localization	0.018559316	0.097247458	0	2	2	2
Biological Process	GO:0009895	negative regulation of catabolic process	0.018559316	0.097247458	0	2	2	2
Biological Process	GO:0019586	galacturonate metabolic process	0.018559316	0.097247458	2	0	2	2
Biological Process	GO:0030855	epithelial cell differentiation	0.018559316	0.097247458	0	2	2	2
Biological Process	GO:0031330	negative regulation of cellular catabolic process	0.018559316	0.097247458	0	2	2	2
Biological Process	GO:0031400	negative regulation of protein modification process	0.018559316	0.097247458	0	2	2	2
Biological Process	GO:0031577	spindle checkpoint	0.018559316	0.097247458	0	2	2	2
Biological Process	GO:0032434	regulation of proteasomal ubiquitin-dependent protein catabolic process	0.018559316	0.097247458	0	2	2	2
Biological Process	GO:0032435	negative regulation of proteasomal ubiquitin-dependent protein catabolic process	0.018559316	0.097247458	0	2	2	2
Biological Process	GO:0032776	DNA methylation on cytosine	0.018559316	0.097247458	0	2	2	2
Biological Process	GO:0033609	oxalate metabolic process	0.018559316	0.097247458	0	2	2	2
Biological Process	GO:0042176	regulation of protein catabolic process	0.018559316	0.097247458	0	2	2	2
Biological Process	GO:0042177	negative regulation of protein catabolic process	0.018559316	0.097247458	0	2	2	2
Biological Process	GO:0042181	ketone biosynthetic process	0.018559316	0.097247458	0	2	2	2
Biological Process	GO:0042374	phylloquinone metabolic process	0.018559316	0.097247458	0	2	2	2
Biological Process	GO:0043266	regulation of potassium ion transport	0.018559316	0.097247458	0	2	2	2
Biological Process	GO:0061136	regulation of proteasomal protein catabolic process	0.018559316	0.097247458	0	2	2	2
Biological Process	GO:0071173	spindle assembly checkpoint	0.018559316	0.097247458	0	2	2	2
Biological Process	GO:1901016	regulation of potassium ion transmembrane transporter activity	0.018559316	0.097247458	0	2	2	2
Biological Process	GO:1901379	regulation of potassium ion transmembrane transport	0.018559316	0.097247458	0	2	2	2
Biological Process	GO:1901663	quinone biosynthetic process	0.018559316	0.097247458	0	2	2	2
Biological Process	GO:1901799	negative regulation of proteasomal protein catabolic process	0.018559316	0.097247458	0	2	2	2
Biological Process	GO:1903050	regulation of proteolysis involved in cellular protein catabolic process	0.018559316	0.097247458	0	2	2	2
Biological Process	GO:1903051	negative regulation of proteolysis involved in cellular protein catabolic process	0.018559316	0.097247458	0	2	2	2
Biological Process	GO:1903362	regulation of cellular protein catabolic process	0.018559316	0.097247458	0	2	2	2
Biological Process	GO:1903363	negative regulation of cellular protein catabolic process	0.018559316	0.097247458	0	2	2	2
Biological Process	GO:1904062	regulation of cation transmembrane transport	0.018559316	0.097247458	0	2	2	2
Biological Process	GO:0055114	oxidation-reduction process	0.019033091	0.099280718	1	19	20	91
Biological Process	GO:0043087	regulation of GTPase activity	0.019159304	0.099490916	1	8	9	31
Biological Process	GO:0006020	inositol metabolic process	0.020383587	0.104907529	0	3	3	5
Biological Process	GO:0016116	carotenoid metabolic process	0.020383587	0.104907529	0	3	3	5
Biological Process	GO:0010817	regulation of hormone levels	0.022730646	0.116469416	4	14	18	81
Biological Process	GO:0043933	macromolecular complex subunit organization	0.022862788	0.116630433	8	66	74	435
Molecular Function	GO:0090599	alpha-glucosidase activity	0.009027068	0.117287268	0	3	3	4
Molecular Function	GO:0008092	cytoskeletal protein binding	0.009369101	0.117287268	2	19	21	91
Biological Process	GO:0051321	meiotic cell cycle	0.023585391	0.118747318	0	8	8	27
Biological Process	GO:0060560	developmental growth involved in morphogenesis	0.023585391	0.118747318	3	5	8	27
Biological Process	GO:1903046	meiotic cell cycle process	0.023585391	0.118747318	0	8	8	27
Molecular Function	GO:0030234	enzyme regulator activity	0.010171939	0.122056768	3	8	11	38
Molecular Function	GO:0016837	carbon-oxygen lyase activity, acting on polysaccharides	0.010472326	0.122056768	2	4	6	15
Biological Process	GO:0006541	glutamine metabolic process	0.024490195	0.122440773	0	4	4	9
Biological Process	GO:0014070	response to organic cyclic compound	0.024530449	0.122440773	9	16	25	123
Biological Process	GO:0009607	response to biotic stimulus	0.024654784	0.122533219	19	27	46	254
Biological Process	GO:0050896	response to stimulus	0.02503561	0.123894175	86	158	244	1608
Biological Process	GO:0010468	regulation of gene expression	0.025992279	0.128081103	37	80	117	727
Biological Process	GO:0007346	regulation of mitotic cell cycle	0.027348128	0.13419124	0	6	6	18
Biological Process	GO:0048583	regulation of response to stimulus	0.028248179	0.13802275	3	11	14	60
Biological Process	GO:0009064	glutamine family amino acid metabolic process	0.028587757	0.139095054	4	8	12	49
Molecular Function	GO:0003677	DNA binding	0.012418733	0.139917727	7	25	32	158
Biological Process	GO:0051188	cofactor biosynthetic process	0.029606821	0.14345062	8	13	21	101
Biological Process	GO:0044249	cellular biosynthetic process	0.0301905	0.145669164	90	150	240	1587
Biological Process	GO:0006974	cellular response to DNA damage stimulus	0.030598998	0.147027549	0	16	16	72
Biological Process	GO:0042221	response to chemical	0.031188837	0.14924245	49	68	117	732
Molecular Function	GO:0098772	molecular function regulator	0.014674744	0.155019986	3	9	12	45
Molecular Function	GO:0003676	nucleic acid binding	0.014725757	0.155019986	14	84	98	586
Molecular Function	GO:0003690	double-stranded DNA binding	0.015135087	0.155019986	0	4	4	8
Biological Process	GO:0048646	anatomical structure formation involved in morphogenesis	0.033116314	0.157813547	2	10	12	50
Biological Process	GO:0044260	cellular macromolecule metabolic process	0.034933271	0.16578987	129	275	404	2765
Biological Process	GO:0009058	biosynthetic process	0.03564901	0.168496135	94	164	258	1721
Biological Process	GO:0032502	developmental process	0.036071444	0.168520373	34	125	159	1026
Biological Process	GO:0042214	terpene metabolic process	0.036496927	0.168520373	3	1	4	10
Biological Process	GO:0045595	regulation of cell differentiation	0.036496927	0.168520373	0	4	4	10
Biological Process	GO:0009396	folic acid-containing compound biosynthetic process	0.036672827	0.168520373	0	3	3	6
Biological Process	GO:0042398	cellular modified amino acid biosynthetic process	0.036672827	0.168520373	0	3	3	6
Biological Process	GO:0042559	pteridine-containing compound biosynthetic process	0.036672827	0.168520373	0	3	3	6
Biological Process	GO:0048585	negative regulation of response to stimulus	0.036672827	0.168520373	0	3	3	6
Biological Process	GO:0003002	regionalization	0.03774369	0.172755704	6	9	15	68
Biological Process	GO:0006950	response to stress	0.038091167	0.173659729	63	78	141	903
Biological Process	GO:0071669	plant-type cell wall organization or biogenesis	0.038288327	0.173874051	8	2	10	40
Biological Process	GO:0006520	cellular amino acid metabolic process	0.0386656	0.174901427	32	34	66	393
Molecular Function	GO:0003913	DNA photolyase activity	0.018496265	0.183874638	0	2	2	2
Molecular Function	GO:0016740	transferase activity	0.019266357	0.186057965	128	205	333	2233
Biological Process	GO:0044237	cellular metabolic process	0.041523805	0.187099481	225	408	633	4445
Molecular Function	GO:0016702	oxidoreductase activity, acting on single donors with incorporation of molecular oxygen, incorporation of two atoms of oxygen	0.020287414	0.187186042	0	3	3	5
Molecular Function	GO:0003824	catalytic activity	0.02049078	0.187186042	340	534	874	6227
Biological Process	GO:0044711	single-organism biosynthetic process	0.042209166	0.189450442	41	61	102	638
Cellular Component	GO:0098687	chromosomal region	0.02147248	0.19325232	0	4	4	9
Biological Process	GO:0010243	response to organonitrogen compound	0.043664947	0.195227833	4	8	12	52
Biological Process	GO:0009826	unidimensional cell growth	0.044636625	0.197518719	3	4	7	25
Biological Process	GO:0009888	tissue development	0.04464006	0.197518719	8	36	44	251
Biological Process	GO:0006310	DNA recombination	0.044689037	0.197518719	0	10	10	41
Biological Process	GO:0016043	cellular component organization	0.045821659	0.201754683	41	133	174	1139
Biological Process	GO:0010033	response to organic substance	0.047141963	0.206781792	30	52	82	505
Molecular Function	GO:0034061	DNA polymerase activity	0.023363912	0.207265373	0	8	8	27
Molecular Function	GO:0016757	transferase activity, transferring glycosyl groups	0.023915235	0.207265373	29	30	59	338
Biological Process	GO:0016049	cell growth	0.047933882	0.20946202	3	13	16	76
Biological Process	GO:0006779	porphyrin-containing compound biosynthetic process	0.049727358	0.210741457	6	6	12	53
Biological Process	GO:0033014	tetrapyrrole biosynthetic process	0.049727358	0.210741457	6	6	12	53
Biological Process	GO:0000075	cell cycle checkpoint	0.050627082	0.210741457	0	2	2	3
Biological Process	GO:0002833	positive regulation of response to biotic stimulus	0.050627082	0.210741457	0	2	2	3
Biological Process	GO:0010029	regulation of seed germination	0.050627082	0.210741457	0	2	2	3
Biological Process	GO:0010959	regulation of metal ion transport	0.050627082	0.210741457	0	2	2	3
Biological Process	GO:0030162	regulation of proteolysis	0.050627082	0.210741457	0	2	2	3
Biological Process	GO:0043462	regulation of ATPase activity	0.050627082	0.210741457	2	0	2	3
Biological Process	GO:0045861	negative regulation of proteolysis	0.050627082	0.210741457	0	2	2	3
Biological Process	GO:1900140	regulation of seedling development	0.050627082	0.210741457	0	2	2	3
Biological Process	GO:1901678	iron coordination entity transport	0.050627082	0.210741457	2	0	2	3
Biological Process	GO:0009292	genetic transfer	0.051317322	0.210741457	1	3	4	11
Biological Process	GO:0010212	response to ionizing radiation	0.051317322	0.210741457	0	4	4	11
Biological Process	GO:0071900	regulation of protein serine/threonine kinase activity	0.051317322	0.210741457	2	2	4	11
Biological Process	GO:0006261	DNA-dependent DNA replication	0.051320458	0.210741457	1	7	8	31
Biological Process	GO:0009812	flavonoid metabolic process	0.051320458	0.210741457	0	8	8	31
Biological Process	GO:0044786	cell cycle DNA replication	0.051320458	0.210741457	1	7	8	31
Biological Process	GO:0044710	single-organism metabolic process	0.051917907	0.21244147	148	252	400	2756
Biological Process	GO:0030243	cellulose metabolic process	0.052252589	0.213058093	4	10	14	65
Biological Process	GO:0051273	beta-glucan metabolic process	0.05321583	0.216224318	4	13	17	83
Biological Process	GO:1901700	response to oxygen-containing compound	0.053666338	0.217292375	23	24	47	274
Biological Process	GO:1901362	organic cyclic compound biosynthetic process	0.054486056	0.219842695	42	49	91	570
Biological Process	GO:0070192	chromosome organization involved in meiotic cell cycle	0.055879557	0.224571972	0	5	5	16
Biological Process	GO:0009813	flavonoid biosynthetic process	0.056046028	0.224571972	0	6	6	21
Biological Process	GO:0016106	sesquiterpenoid biosynthetic process	0.057783251	0.229941595	3	0	3	7
Biological Process	GO:0031329	regulation of cellular catabolic process	0.057783251	0.229941595	1	2	3	7
Cellular Component	GO:0005618	cell wall	0.027688507	0.233621775	2	13	15	68
Cellular Component	GO:0000775	chromosome, centromeric region	0.033105564	0.24829173	0	3	3	6
Cellular Component	GO:0000776	kinetochore	0.033105564	0.24829173	0	3	3	6
Biological Process	GO:0070887	cellular response to chemical stimulus	0.066960218	0.265547715	20	28	48	285
Biological Process	GO:0051171	regulation of nitrogen compound metabolic process	0.069203115	0.272962052	9	44	53	319
Biological Process	GO:0006996	organelle organization	0.069301246	0.272962052	15	93	108	694
Molecular Function	GO:0001883	purine nucleoside binding	0.035166981	0.274205727	45	163	208	1370
Molecular Function	GO:0032549	ribonucleoside binding	0.035166981	0.274205727	45	163	208	1370
Molecular Function	GO:0032550	purine ribonucleoside binding	0.035166981	0.274205727	45	163	208	1370
Molecular Function	GO:0016759	cellulose synthase activity	0.03522821	0.274205727	2	4	6	19
Molecular Function	GO:0003916	DNA topoisomerase activity	0.03650668	0.274205727	0	3	3	6
Molecular Function	GO:0015645	fatty acid ligase activity	0.03650668	0.274205727	0	3	3	6
Biological Process	GO:0071310	cellular response to organic substance	0.072490612	0.284556368	19	28	47	280
Molecular Function	GO:0016835	carbon-oxygen lyase activity	0.039520711	0.290391308	7	6	13	57
Biological Process	GO:0009059	macromolecule biosynthetic process	0.076073646	0.297203487	45	107	152	1004
Biological Process	GO:0034645	cellular macromolecule biosynthetic process	0.076225765	0.297203487	43	103	146	962
Molecular Function	GO:0048037	cofactor binding	0.043053536	0.297780825	9	9	18	87
Molecular Function	GO:0008757	S-adenosylmethionine-dependent methyltransferase activity	0.044241181	0.297780825	0	10	10	41
Molecular Function	GO:0016278	lysine N-methyltransferase activity	0.044717003	0.297780825	0	6	6	20
Molecular Function	GO:0016279	protein-lysine N-methyltransferase activity	0.044717003	0.297780825	0	6	6	20
Molecular Function	GO:0001882	nucleoside binding	0.04550894	0.297780825	45	163	208	1380
Molecular Function	GO:0097367	carbohydrate derivative binding	0.046440433	0.297780825	48	163	211	1402
Molecular Function	GO:0005488	binding	0.050153376	0.297780825	209	398	607	4272
Molecular Function	GO:0002094	polyprenyltransferase activity	0.050463707	0.297780825	0	2	2	3
Molecular Function	GO:0003724	RNA helicase activity	0.050463707	0.297780825	0	2	2	3
Molecular Function	GO:0015603	iron chelate transmembrane transporter activity	0.050463707	0.297780825	2	0	2	3
Molecular Function	GO:0090595	acetyl-CoA:L-lysine N6-acetyltransferase	0.050463707	0.297780825	2	0	2	3
Molecular Function	GO:0046906	tetrapyrrole binding	0.051580388	0.297780825	21	15	36	202
Molecular Function	GO:0016830	carbon-carbon lyase activity	0.052483054	0.297780825	6	10	16	77
Molecular Function	GO:0008422	beta-glucosidase activity	0.05374151	0.297780825	4	3	7	26
Molecular Function	GO:0015925	galactosidase activity	0.05374151	0.297780825	2	5	7	26
Biological Process	GO:0048513	animal organ development	0.077483259	0.301092663	4	20	24	131
Biological Process	GO:0033554	cellular response to stress	0.080087135	0.310170241	10	29	39	229
Biological Process	GO:0048580	regulation of post-embryonic development	0.081470157	0.314474805	2	20	22	119
Cellular Component	GO:0000808	origin recognition complex	0.047086506	0.317833913	0	2	2	3
Cellular Component	GO:0005876	spindle microtubule	0.047086506	0.317833913	0	2	2	3
Biological Process	GO:0015977	carbon fixation	0.083317403	0.318420964	1	2	3	8
Biological Process	GO:0016119	carotene metabolic process	0.083317403	0.318420964	2	1	3	8
Biological Process	GO:0045165	cell fate commitment	0.083317403	0.318420964	0	3	3	8
Biological Process	GO:0032268	regulation of cellular protein metabolic process	0.084499299	0.320477741	8	20	28	158
Biological Process	GO:0051246	regulation of protein metabolic process	0.084499299	0.320477741	8	20	28	158
Biological Process	GO:0044283	small molecule biosynthetic process	0.084685828	0.320477741	16	32	48	290
Biological Process	GO:0009696	salicylic acid metabolic process	0.085404982	0.321100548	4	5	9	40
Biological Process	GO:0042537	benzene-containing compound metabolic process	0.085404982	0.321100548	4	5	9	40
Biological Process	GO:0006714	sesquiterpenoid metabolic process	0.087240253	0.326939202	3	2	5	18
Molecular Function	GO:0019900	kinase binding	0.060079541	0.327530399	2	6	8	32
Biological Process	GO:0044085	cellular component biogenesis	0.089482614	0.331513687	18	43	61	379
Biological Process	GO:0071555	cell wall organization	0.089812072	0.331513687	4	17	21	114
Biological Process	GO:0003333	amino acid transmembrane transport	0.092182562	0.331513687	0	2	2	4
Biological Process	GO:0007005	mitochondrion organization	0.092182562	0.331513687	2	0	2	4
Biological Process	GO:0009753	response to jasmonic acid	0.092182562	0.331513687	2	0	2	4
Biological Process	GO:0009765	photosynthesis, light harvesting	0.092182562	0.331513687	0	2	2	4
Biological Process	GO:0009867	jasmonic acid mediated signaling pathway	0.092182562	0.331513687	2	0	2	4
Biological Process	GO:0019627	urea metabolic process	0.092182562	0.331513687	0	2	2	4
Biological Process	GO:0019747	regulation of isoprenoid metabolic process	0.092182562	0.331513687	1	1	2	4
Biological Process	GO:0071395	cellular response to jasmonic acid stimulus	0.092182562	0.331513687	2	0	2	4
Biological Process	GO:0071941	nitrogen cycle metabolic process	0.092182562	0.331513687	0	2	2	4
Biological Process	GO:0098656	anion transmembrane transport	0.092182562	0.331513687	0	2	2	4
Biological Process	GO:1903825	organic acid transmembrane transport	0.092182562	0.331513687	0	2	2	4
Cellular Component	GO:0009507	chloroplast	0.051665851	0.332137611	7	18	25	137
Cellular Component	GO:0044434	chloroplast part	0.055639668	0.341425234	7	16	23	125
Biological Process	GO:0008652	cellular amino acid biosynthetic process	0.097514167	0.349601873	13	18	31	180
Molecular Function	GO:0008378	galactosyltransferase activity	0.068058269	0.355334361	2	4	6	22
Molecular Function	GO:0016744	transferase activity, transferring aldehyde or ketonic groups	0.068565098	0.355334361	1	3	4	12
Molecular Function	GO:0004702	receptor signaling protein serine/threonine kinase activity	0.069384816	0.355334361	5	6	11	50
Molecular Function	GO:0005057	receptor signaling protein activity	0.069384816	0.355334361	5	6	11	50
Biological Process	GO:0044262	cellular carbohydrate metabolic process	0.099529672	0.355632173	8	32	40	240
Biological Process	GO:0006073	cellular glucan metabolic process	0.099810411	0.355632173	5	27	32	187
Biological Process	GO:0016053	organic acid biosynthetic process	0.10278477	0.363990103	16	23	39	234
Biological Process	GO:0046394	carboxylic acid biosynthetic process	0.10278477	0.363990103	16	23	39	234
Biological Process	GO:0009694	jasmonic acid metabolic process	0.104080388	0.366337659	3	4	7	30
Biological Process	GO:0009793	embryo development ending in seed dormancy	0.104080388	0.366337659	1	6	7	30
Biological Process	GO:0044264	cellular polysaccharide metabolic process	0.105317991	0.369570405	5	27	32	188
Biological Process	GO:0006739	NADP metabolic process	0.108178119	0.378460005	0	12	12	60
Biological Process	GO:0000079	regulation of cyclin-dependent protein serine/threonine kinase activity	0.112731007	0.378916393	1	2	3	9
Biological Process	GO:0006081	cellular aldehyde metabolic process	0.112731007	0.378916393	1	2	3	9
Biological Process	GO:0009894	regulation of catabolic process	0.112731007	0.378916393	1	2	3	9
Biological Process	GO:1904029	regulation of cyclin-dependent protein kinase activity	0.112731007	0.378916393	1	2	3	9
Biological Process	GO:0009755	hormone-mediated signaling pathway	0.113147548	0.378916393	14	19	33	196
Biological Process	GO:0043207	response to external biotic stimulus	0.119762757	0.378916393	19	21	40	244
Biological Process	GO:0016114	terpenoid biosynthetic process	0.120586821	0.378916393	6	5	11	55
Biological Process	GO:0009719	response to endogenous stimulus	0.121355892	0.378916393	23	27	50	312
Biological Process	GO:0016143	S-glycoside metabolic process	0.121683392	0.378916393	2	6	8	37
Biological Process	GO:0019757	glycosinolate metabolic process	0.121683392	0.378916393	2	6	8	37
Biological Process	GO:0048588	developmental cell growth	0.121683392	0.378916393	3	5	8	37
Biological Process	GO:0006576	cellular biogenic amine metabolic process	0.121793137	0.378916393	5	5	10	49
Biological Process	GO:0006511	ubiquitin-dependent protein catabolic process	0.122274355	0.378916393	0	9	9	43
Biological Process	GO:0018958	phenol-containing compound metabolic process	0.122274355	0.378916393	4	5	9	43
Biological Process	GO:0051704	multi-organism process	0.125028307	0.378916393	20	24	44	272
Biological Process	GO:0032870	cellular response to hormone stimulus	0.131296398	0.378916393	14	19	33	199
Biological Process	GO:0071495	cellular response to endogenous stimulus	0.131296398	0.378916393	14	19	33	199
Biological Process	GO:0072330	monocarboxylic acid biosynthetic process	0.132642211	0.378916393	5	6	11	56
Biological Process	GO:0044702	single organism reproductive process	0.133184372	0.378916393	7	27	34	206
Biological Process	GO:0022900	electron transport chain	0.134721817	0.378916393	1	9	10	50
Biological Process	GO:0000018	regulation of DNA recombination	0.136285574	0.378916393	0	1	1	1
Biological Process	GO:0000187	activation of MAPK activity	0.136285574	0.378916393	1	0	1	1
Biological Process	GO:0000730	DNA recombinase assembly	0.136285574	0.378916393	0	1	1	1
Biological Process	GO:0001933	negative regulation of protein phosphorylation	0.136285574	0.378916393	0	1	1	1
Biological Process	GO:0006290	pyrimidine dimer repair	0.136285574	0.378916393	0	1	1	1
Biological Process	GO:0006469	negative regulation of protein kinase activity	0.136285574	0.378916393	0	1	1	1
Biological Process	GO:0006537	glutamate biosynthetic process	0.136285574	0.378916393	1	0	1	1
Biological Process	GO:0006636	unsaturated fatty acid biosynthetic process	0.136285574	0.378916393	1	0	1	1
Biological Process	GO:0007127	meiosis I	0.136285574	0.378916393	0	1	1	1
Biological Process	GO:0007131	reciprocal meiotic recombination	0.136285574	0.378916393	0	1	1	1
Biological Process	GO:0009110	vitamin biosynthetic process	0.136285574	0.378916393	0	1	1	1
Biological Process	GO:0009240	isopentenyl diphosphate biosynthetic process	0.136285574	0.378916393	0	1	1	1
Biological Process	GO:0009403	toxin biosynthetic process	0.136285574	0.378916393	1	0	1	1
Biological Process	GO:0009700	indole phytoalexin biosynthetic process	0.136285574	0.378916393	1	0	1	1
Biological Process	GO:0009825	multidimensional cell growth	0.136285574	0.378916393	0	1	1	1
Biological Process	GO:0010322	regulation of isopentenyl diphosphate biosynthetic process, methylerythritol 4-phosphate pathway	0.136285574	0.378916393	0	1	1	1
Biological Process	GO:0010332	response to gamma radiation	0.136285574	0.378916393	0	1	1	1
Biological Process	GO:0010375	stomatal complex patterning	0.136285574	0.378916393	1	0	1	1
Biological Process	GO:0010520	regulation of reciprocal meiotic recombination	0.136285574	0.378916393	0	1	1	1
Biological Process	GO:0010563	negative regulation of phosphorus metabolic process	0.136285574	0.378916393	0	1	1	1
Biological Process	GO:0015822	ornithine transport	0.136285574	0.378916393	0	1	1	1
Biological Process	GO:0019288	isopentenyl diphosphate biosynthetic process, methylerythritol 4-phosphate pathway	0.136285574	0.378916393	0	1	1	1
Biological Process	GO:0031057	negative regulation of histone modification	0.136285574	0.378916393	0	1	1	1
Biological Process	GO:0031058	positive regulation of histone modification	0.136285574	0.378916393	0	1	1	1
Biological Process	GO:0031060	regulation of histone methylation	0.136285574	0.378916393	0	1	1	1
Biological Process	GO:0031062	positive regulation of histone methylation	0.136285574	0.378916393	0	1	1	1
Biological Process	GO:0032196	transposition	0.136285574	0.378916393	0	1	1	1
Biological Process	GO:0033206	meiotic cytokinesis	0.136285574	0.378916393	0	1	1	1
Biological Process	GO:0033559	unsaturated fatty acid metabolic process	0.136285574	0.378916393	1	0	1	1
Biological Process	GO:0033673	negative regulation of kinase activity	0.136285574	0.378916393	0	1	1	1
Biological Process	GO:0035065	regulation of histone acetylation	0.136285574	0.378916393	0	1	1	1
Biological Process	GO:0035067	negative regulation of histone acetylation	0.136285574	0.378916393	0	1	1	1
Biological Process	GO:0035825	reciprocal DNA recombination	0.136285574	0.378916393	0	1	1	1
Biological Process	GO:0042326	negative regulation of phosphorylation	0.136285574	0.378916393	0	1	1	1
Biological Process	GO:0042364	water-soluble vitamin biosynthetic process	0.136285574	0.378916393	0	1	1	1
Biological Process	GO:0043406	positive regulation of MAP kinase activity	0.136285574	0.378916393	1	0	1	1
Biological Process	GO:0043410	positive regulation of MAPK cascade	0.136285574	0.378916393	1	0	1	1
Biological Process	GO:0045003	double-strand break repair via synthesis-dependent strand annealing	0.136285574	0.378916393	0	1	1	1
Biological Process	GO:0045936	negative regulation of phosphate metabolic process	0.136285574	0.378916393	0	1	1	1
Biological Process	GO:0046217	indole phytoalexin metabolic process	0.136285574	0.378916393	1	0	1	1
Biological Process	GO:0046452	dihydrofolate metabolic process	0.136285574	0.378916393	0	1	1	1
Biological Process	GO:0046490	isopentenyl diphosphate metabolic process	0.136285574	0.378916393	0	1	1	1
Biological Process	GO:0051348	negative regulation of transferase activity	0.136285574	0.378916393	0	1	1	1
Biological Process	GO:0052314	phytoalexin metabolic process	0.136285574	0.378916393	1	0	1	1
Biological Process	GO:0052315	phytoalexin biosynthetic process	0.136285574	0.378916393	1	0	1	1
Biological Process	GO:0060631	regulation of meiosis I	0.136285574	0.378916393	0	1	1	1
Biological Process	GO:0065004	protein-DNA complex assembly	0.136285574	0.378916393	0	1	1	1
Biological Process	GO:0071071	regulation of phospholipid biosynthetic process	0.136285574	0.378916393	0	1	1	1
Biological Process	GO:0071902	positive regulation of protein serine/threonine kinase activity	0.136285574	0.378916393	1	0	1	1
Biological Process	GO:0080135	regulation of cellular response to stress	0.136285574	0.378916393	1	0	1	1
Biological Process	GO:1901983	regulation of protein acetylation	0.136285574	0.378916393	0	1	1	1
Biological Process	GO:1901984	negative regulation of protein acetylation	0.136285574	0.378916393	0	1	1	1
Biological Process	GO:1902533	positive regulation of intracellular signal transduction	0.136285574	0.378916393	1	0	1	1
Biological Process	GO:1903309	negative regulation of chromatin modification	0.136285574	0.378916393	0	1	1	1
Biological Process	GO:1903310	positive regulation of chromatin modification	0.136285574	0.378916393	0	1	1	1
Biological Process	GO:1903725	regulation of phospholipid metabolic process	0.136285574	0.378916393	0	1	1	1
Biological Process	GO:2000756	regulation of peptidyl-lysine acetylation	0.136285574	0.378916393	0	1	1	1
Biological Process	GO:2000757	negative regulation of peptidyl-lysine acetylation	0.136285574	0.378916393	0	1	1	1
Biological Process	GO:2001251	negative regulation of chromosome organization	0.136285574	0.378916393	0	1	1	1
Biological Process	GO:0008283	cell proliferation	0.136784939	0.378916393	0	8	8	38
Biological Process	GO:0043473	pigmentation	0.136784939	0.378916393	4	4	8	38
Biological Process	GO:0043476	pigment accumulation	0.136784939	0.378916393	4	4	8	38
Biological Process	GO:0043478	pigment accumulation in response to UV light	0.136784939	0.378916393	4	4	8	38
Biological Process	GO:0043479	pigment accumulation in tissues in response to UV light	0.136784939	0.378916393	4	4	8	38
Biological Process	GO:0043480	pigment accumulation in tissues	0.136784939	0.378916393	4	4	8	38
Biological Process	GO:0015893	drug transport	0.137041091	0.378916393	0	4	4	15
Biological Process	GO:0042493	response to drug	0.137041091	0.378916393	0	4	4	15
Biological Process	GO:0051128	regulation of cellular component organization	0.137616174	0.378916393	2	14	16	88
Biological Process	GO:0006266	DNA ligation	0.140048546	0.378916393	0	2	2	5
Biological Process	GO:0009733	response to auxin	0.140048546	0.378916393	0	2	2	5
Biological Process	GO:0009734	auxin-activated signaling pathway	0.140048546	0.378916393	0	2	2	5
Biological Process	GO:0019856	pyrimidine nucleobase biosynthetic process	0.140048546	0.378916393	1	1	2	5
Biological Process	GO:0034599	cellular response to oxidative stress	0.140048546	0.378916393	1	1	2	5
Biological Process	GO:0034614	cellular response to reactive oxygen species	0.140048546	0.378916393	1	1	2	5
Biological Process	GO:0046890	regulation of lipid biosynthetic process	0.140048546	0.378916393	1	1	2	5
Biological Process	GO:0060429	epithelium development	0.140048546	0.378916393	0	2	2	5
Biological Process	GO:0071365	cellular response to auxin stimulus	0.140048546	0.378916393	0	2	2	5
Biological Process	GO:0009887	organ morphogenesis	0.141759219	0.382650759	2	13	15	82
Biological Process	GO:0010638	positive regulation of organelle organization	0.145402755	0.388860024	2	1	3	10
Biological Process	GO:0032844	regulation of homeostatic process	0.145402755	0.388860024	0	3	3	10
Biological Process	GO:0048584	positive regulation of response to stimulus	0.145402755	0.388860024	1	2	3	10
Biological Process	GO:0051130	positive regulation of cellular component organization	0.145402755	0.388860024	2	1	3	10
Molecular Function	GO:0036094	small molecule binding	0.077376215	0.390345679	56	188	244	1659
Biological Process	GO:0051707	response to other organism	0.147226478	0.392830095	19	20	39	242
Biological Process	GO:0009260	ribonucleotide biosynthetic process	0.148345927	0.394001338	0	10	10	51
Biological Process	GO:0046390	ribose phosphate biosynthetic process	0.148345927	0.394001338	0	10	10	51
Biological Process	GO:0033993	response to lipid	0.150920256	0.399921411	2	7	9	45
Molecular Function	GO:0016779	nucleotidyltransferase activity	0.08230445	0.400628051	3	18	21	113
Molecular Function	GO:0016211	ammonia ligase activity	0.082970306	0.400628051	0	3	3	8
Molecular Function	GO:0016880	acid-ammonia (or amide) ligase activity	0.082970306	0.400628051	0	3	3	8
Molecular Function	GO:0016787	hydrolase activity	0.087910179	0.41850198	76	185	261	1787
Cellular Component	GO:0009579	thylakoid	0.074582073	0.430267312	7	16	23	129
Cellular Component	GO:0005874	microtubule	0.086053462	0.430267312	0	2	2	4
Cellular Component	GO:0009522	photosystem I	0.086053462	0.430267312	0	2	2	4
Cellular Component	GO:0099512	supramolecular fiber	0.086053462	0.430267312	0	2	2	4
Cellular Component	GO:0099513	polymeric cytoskeletal fiber	0.086053462	0.430267312	0	2	2	4
Molecular Function	GO:0015368	calcium:cation antiporter activity	0.091900345	0.431421066	2	0	2	4
Biological Process	GO:0080134	regulation of response to stress	0.164094936	0.433840035	3	1	4	16
Molecular Function	GO:0008276	protein methyltransferase activity	0.097259075	0.450322841	0	6	6	24
Biological Process	GO:0001558	regulation of cell growth	0.171106685	0.451347474	0	5	5	22
Biological Process	GO:0008299	isoprenoid biosynthetic process	0.172491467	0.453966179	6	5	11	59
Biological Process	GO:0006595	polyamine metabolic process	0.172897495	0.454002945	4	2	6	28
Biological Process	GO:0015698	inorganic anion transport	0.174963009	0.458387251	7	6	13	72
Biological Process	GO:0044106	cellular amine metabolic process	0.177578444	0.46314378	5	5	10	53
Biological Process	GO:0048589	developmental growth	0.177578444	0.46314378	3	7	10	53
Biological Process	GO:0071704	organic substance metabolic process	0.178396361	0.46423143	235	423	658	4721
Biological Process	GO:0007389	pattern specification process	0.180658665	0.46599775	6	10	16	92
Biological Process	GO:0006760	folic acid-containing compound metabolic process	0.180684793	0.46599775	0	3	3	11
Biological Process	GO:0009845	seed germination	0.180684793	0.46599775	0	3	3	11
Biological Process	GO:0042558	pteridine-containing compound metabolic process	0.180684793	0.46599775	0	3	3	11
Molecular Function	GO:0008047	enzyme activator activity	0.1114478	0.467317795	0	4	4	14
Molecular Function	GO:0016868	intramolecular transferase activity, phosphotransferases	0.112281302	0.467317795	2	1	3	9
Molecular Function	GO:0050664	oxidoreductase activity, acting on NAD(P)H, oxygen as acceptor	0.112281302	0.467317795	3	0	3	9
Molecular Function	GO:0004674	protein serine/threonine kinase activity	0.131854248	0.467317795	8	15	23	133
Molecular Function	GO:0008170	N-methyltransferase activity	0.132063786	0.467317795	0	6	6	26
Molecular Function	GO:0016877	ligase activity, forming carbon-sulfur bonds	0.132063786	0.467317795	0	6	6	26
Molecular Function	GO:0004690	cyclic nucleotide-dependent protein kinase activity	0.136054422	0.467317795	0	1	1	1
Molecular Function	GO:0004866	endopeptidase inhibitor activity	0.136054422	0.467317795	1	0	1	1
Molecular Function	GO:0005381	iron ion transmembrane transporter activity	0.136054422	0.467317795	0	1	1	1
Molecular Function	GO:0015020	glucuronosyltransferase activity	0.136054422	0.467317795	1	0	1	1
Molecular Function	GO:0015930	glutamate synthase activity	0.136054422	0.467317795	1	0	1	1
Molecular Function	GO:0016731	oxidoreductase activity, acting on iron-sulfur proteins as donors, NAD or NADP as acceptor	0.136054422	0.467317795	0	1	1	1
Molecular Function	GO:0016743	carboxyl- or carbamoyltransferase activity	0.136054422	0.467317795	0	1	1	1
Molecular Function	GO:0018271	biotin-protein ligase activity	0.136054422	0.467317795	0	1	1	1
Molecular Function	GO:0030414	peptidase inhibitor activity	0.136054422	0.467317795	1	0	1	1
Molecular Function	GO:0042389	omega-3 fatty acid desaturase activity	0.136054422	0.467317795	1	0	1	1
Molecular Function	GO:0045181	glutamate synthase activity, NAD(P)H as acceptor	0.136054422	0.467317795	1	0	1	1
Molecular Function	GO:0046992	oxidoreductase activity, acting on X-H and Y-H to form an X-Y bond	0.136054422	0.467317795	1	0	1	1
Molecular Function	GO:0046993	oxidoreductase activity, acting on X-H and Y-H to form an X-Y bond, with oxygen as acceptor	0.136054422	0.467317795	1	0	1	1
Molecular Function	GO:0052841	inositol bisdiphosphate tetrakisphosphate diphosphatase activity	0.136054422	0.467317795	1	0	1	1
Molecular Function	GO:0052842	inositol diphosphate pentakisphosphate diphosphatase activity	0.136054422	0.467317795	1	0	1	1
Molecular Function	GO:0061134	peptidase regulator activity	0.136054422	0.467317795	1	0	1	1
Molecular Function	GO:0061135	endopeptidase regulator activity	0.136054422	0.467317795	1	0	1	1
Molecular Function	GO:0003909	DNA ligase activity	0.1396423	0.467317795	0	2	2	5
Molecular Function	GO:0004661	protein geranylgeranyltransferase activity	0.1396423	0.467317795	0	2	2	5
Molecular Function	GO:0008318	protein prenyltransferase activity	0.1396423	0.467317795	0	2	2	5
Molecular Function	GO:0015085	calcium ion transmembrane transporter activity	0.1396423	0.467317795	2	0	2	5
Molecular Function	GO:0072509	divalent inorganic cation transmembrane transporter activity	0.1396423	0.467317795	2	0	2	5
Molecular Function	GO:0008094	DNA-dependent ATPase activity	0.144847866	0.474330521	0	3	3	10
Molecular Function	GO:0015399	primary active transmembrane transporter activity	0.145947853	0.474330521	4	16	20	115
Molecular Function	GO:0015405	P-P-bond-hydrolysis-driven transmembrane transporter activity	0.145947853	0.474330521	4	16	20	115
Molecular Function	GO:0001071	nucleic acid binding transcription factor activity	0.14801044	0.476452653	19	4	23	135
Biological Process	GO:0048437	floral organ development	0.188051097	0.48347935	1	12	13	73
Biological Process	GO:0043436	oxoacid metabolic process	0.188298089	0.48347935	56	76	132	902
Biological Process	GO:0000724	double-strand break repair via homologous recombination	0.191736405	0.486634926	0	2	2	6
Biological Process	GO:0006302	double-strand break repair	0.191736405	0.486634926	0	2	2	6
Biological Process	GO:0006573	valine metabolic process	0.191736405	0.486634926	0	2	2	6
Biological Process	GO:0009625	response to insect	0.191736405	0.486634926	1	1	2	6
Biological Process	GO:0019216	regulation of lipid metabolic process	0.191736405	0.486634926	1	1	2	6
Biological Process	GO:0006082	organic acid metabolic process	0.192157093	0.486634926	56	76	132	903
Biological Process	GO:0009891	positive regulation of biosynthetic process	0.192861515	0.486634926	4	0	4	17
Biological Process	GO:0048507	meristem development	0.192888973	0.486634926	3	23	26	160
Biological Process	GO:0009943	adaxial/abaxial axis specification	0.194566453	0.487679552	2	4	6	29
Biological Process	GO:0016144	S-glycoside biosynthetic process	0.194566453	0.487679552	2	4	6	29
Biological Process	GO:0019758	glycosinolate biosynthetic process	0.194566453	0.487679552	2	4	6	29
Biological Process	GO:0090567	reproductive shoot system development	0.195333383	0.488544402	7	16	23	140
Biological Process	GO:0006732	coenzyme metabolic process	0.196695946	0.490892036	5	23	28	174
Biological Process	GO:0048229	gametophyte development	0.199686463	0.496216575	4	11	15	87
Biological Process	GO:0071407	cellular response to organic cyclic compound	0.199686463	0.496216575	6	9	15	87
Biological Process	GO:0006090	pyruvate metabolic process	0.205526772	0.509635977	10	18	28	175
Biological Process	GO:0002376	immune system process	0.207547802	0.513547766	11	9	20	121
Biological Process	GO:0009404	toxin metabolic process	0.209244852	0.515620811	4	6	10	55
Biological Process	GO:0009308	amine metabolic process	0.20927615	0.515620811	6	6	12	68
Biological Process	GO:0010154	fruit development	0.211687104	0.518905743	1	6	7	36
Biological Process	GO:0048316	seed development	0.211687104	0.518905743	1	6	7	36
Biological Process	GO:0051716	cellular response to stimulus	0.211953727	0.518905743	34	65	99	673
Biological Process	GO:0009653	anatomical structure morphogenesis	0.213594546	0.519284989	10	43	53	349
Biological Process	GO:0009955	adaxial/abaxial pattern specification	0.21718797	0.519284989	2	4	6	30
Biological Process	GO:0009218	pyrimidine ribonucleotide metabolic process	0.217938259	0.519284989	0	3	3	12
Biological Process	GO:0009220	pyrimidine ribonucleotide biosynthetic process	0.217938259	0.519284989	0	3	3	12
Biological Process	GO:0009687	abscisic acid metabolic process	0.217938259	0.519284989	1	2	3	12
Biological Process	GO:0010374	stomatal complex development	0.217938259	0.519284989	2	1	3	12
Biological Process	GO:0010498	proteasomal protein catabolic process	0.217938259	0.519284989	0	3	3	12
Biological Process	GO:0043161	proteasome-mediated ubiquitin-dependent protein catabolic process	0.217938259	0.519284989	0	3	3	12
Biological Process	GO:0043288	apocarotenoid metabolic process	0.217938259	0.519284989	1	2	3	12
Biological Process	GO:0046132	pyrimidine ribonucleoside biosynthetic process	0.217938259	0.519284989	0	3	3	12
Biological Process	GO:0046134	pyrimidine nucleoside biosynthetic process	0.217938259	0.519284989	0	3	3	12
Biological Process	GO:0090351	seedling development	0.217938259	0.519284989	0	3	3	12
Biological Process	GO:1902644	tertiary alcohol metabolic process	0.217938259	0.519284989	1	2	3	12
Molecular Function	GO:0004659	prenyltransferase activity	0.163359539	0.52090117	0	4	4	16
Biological Process	GO:0008272	sulfate transport	0.223039019	0.529260622	3	1	4	18
Biological Process	GO:0072348	sulfur compound transport	0.223039019	0.529260622	3	1	4	18
Biological Process	GO:0009908	flower development	0.224089116	0.530665023	2	16	18	109
Biological Process	GO:0009725	response to hormone	0.225480771	0.532870884	18	24	42	274
Cellular Component	GO:0031225	anchored component of membrane	0.11120299	0.536157272	0	5	5	20
Cellular Component	GO:0031976	plastid thylakoid	0.115556016	0.536805118	2	14	16	89
Cellular Component	GO:0005657	replication fork	0.131219029	0.536805118	0	1	1	1
Cellular Component	GO:0005811	lipid particle	0.131219029	0.536805118	1	0	1	1
Cellular Component	GO:0030894	replisome	0.131219029	0.536805118	0	1	1	1
Cellular Component	GO:0032300	mismatch repair complex	0.131219029	0.536805118	0	1	1	1
Biological Process	GO:0018130	heterocycle biosynthetic process	0.228856198	0.539746389	26	45	71	478
Molecular Function	GO:0016765	transferase activity, transferring alkyl or aryl (other than methyl) groups	0.170934687	0.539961909	3	4	7	34
Biological Process	GO:0016109	tetraterpenoid biosynthetic process	0.23268797	0.546437412	2	5	7	37
Biological Process	GO:0071396	cellular response to lipid	0.23268797	0.546437412	1	6	7	37
Biological Process	GO:0010646	regulation of cell communication	0.234887464	0.546437412	2	7	9	50
Biological Process	GO:0044272	sulfur compound biosynthetic process	0.23605947	0.546437412	11	12	23	144
Biological Process	GO:0009798	axis specification	0.240640594	0.546437412	2	4	6	31
Biological Process	GO:1901659	glycosyl compound biosynthetic process	0.243040855	0.546437412	2	8	10	57
Biological Process	GO:0009108	coenzyme biosynthetic process	0.244365384	0.546437412	2	6	8	44
Biological Process	GO:0040007	growth	0.24515633	0.546437412	4	18	22	138
Biological Process	GO:0000154	rRNA modification	0.245317667	0.546437412	0	2	2	7
Biological Process	GO:0000956	nuclear-transcribed mRNA catabolic process	0.245317667	0.546437412	0	2	2	7
Biological Process	GO:0001763	morphogenesis of a branching structure	0.245317667	0.546437412	2	0	2	7
Biological Process	GO:0006241	CTP biosynthetic process	0.245317667	0.546437412	0	2	2	7
Biological Process	GO:0008037	cell recognition	0.245317667	0.546437412	1	1	2	7
Biological Process	GO:0015851	nucleobase transport	0.245317667	0.546437412	0	2	2	7
Biological Process	GO:0030838	positive regulation of actin filament polymerization	0.245317667	0.546437412	2	0	2	7
Biological Process	GO:0031334	positive regulation of protein complex assembly	0.245317667	0.546437412	2	0	2	7
Biological Process	GO:0032273	positive regulation of protein polymerization	0.245317667	0.546437412	2	0	2	7
Biological Process	GO:0044089	positive regulation of cellular component biogenesis	0.245317667	0.546437412	2	0	2	7
Biological Process	GO:0045010	actin nucleation	0.245317667	0.546437412	2	0	2	7
Biological Process	GO:0046036	CTP metabolic process	0.245317667	0.546437412	0	2	2	7
Biological Process	GO:0015849	organic acid transport	0.249677556	0.546437412	5	6	11	64
Biological Process	GO:0046942	carboxylic acid transport	0.249677556	0.546437412	5	6	11	64
Biological Process	GO:1901698	response to nitrogen compound	0.252734647	0.546437412	5	10	15	91
Biological Process	GO:0000165	MAPK cascade	0.254011832	0.546437412	1	0	1	2
Biological Process	GO:0006528	asparagine metabolic process	0.254011832	0.546437412	0	1	1	2
Biological Process	GO:0006529	asparagine biosynthetic process	0.254011832	0.546437412	0	1	1	2
Biological Process	GO:0006842	tricarboxylic acid transport	0.254011832	0.546437412	0	1	1	2
Biological Process	GO:0006915	apoptotic process	0.254011832	0.546437412	1	0	1	2
Biological Process	GO:0008361	regulation of cell size	0.254011832	0.546437412	1	0	1	2
Biological Process	GO:0009312	oligosaccharide biosynthetic process	0.254011832	0.546437412	1	0	1	2
Biological Process	GO:0009612	response to mechanical stimulus	0.254011832	0.546437412	0	1	1	2
Biological Process	GO:0009956	radial pattern formation	0.254011832	0.546437412	0	1	1	2
Biological Process	GO:0009967	positive regulation of signal transduction	0.254011832	0.546437412	1	0	1	2
Biological Process	GO:0010647	positive regulation of cell communication	0.254011832	0.546437412	1	0	1	2
Biological Process	GO:0010675	regulation of cellular carbohydrate metabolic process	0.254011832	0.546437412	0	1	1	2
Biological Process	GO:0023014	signal transduction by protein phosphorylation	0.254011832	0.546437412	1	0	1	2
Biological Process	GO:0023056	positive regulation of signaling	0.254011832	0.546437412	1	0	1	2
Biological Process	GO:0040020	regulation of meiotic nuclear division	0.254011832	0.546437412	0	1	1	2
Biological Process	GO:0042435	indole-containing compound biosynthetic process	0.254011832	0.546437412	1	0	1	2
Biological Process	GO:0042981	regulation of apoptotic process	0.254011832	0.546437412	1	0	1	2
Biological Process	GO:0043405	regulation of MAP kinase activity	0.254011832	0.546437412	1	0	1	2
Biological Process	GO:0043408	regulation of MAPK cascade	0.254011832	0.546437412	1	0	1	2
Biological Process	GO:0043692	monoterpene metabolic process	0.254011832	0.546437412	1	0	1	2
Biological Process	GO:0051445	regulation of meiotic cell cycle	0.254011832	0.546437412	0	1	1	2
Biological Process	GO:0060771	phyllotactic patterning	0.254011832	0.546437412	0	1	1	2
Biological Process	GO:2001252	positive regulation of chromosome organization	0.254011832	0.546437412	0	1	1	2
Biological Process	GO:0044764	multi-organism cellular process	0.254323599	0.546437412	1	3	4	19
Biological Process	GO:0016108	tetraterpenoid metabolic process	0.254343493	0.546437412	2	5	7	38
Biological Process	GO:0006928	movement of cell or subcellular component	0.256557382	0.547133422	2	1	3	13
Biological Process	GO:0009739	response to gibberellin	0.256557382	0.547133422	1	2	3	13
Biological Process	GO:0010476	gibberellin mediated signaling pathway	0.256557382	0.547133422	1	2	3	13
Biological Process	GO:0071370	cellular response to gibberellin stimulus	0.256557382	0.547133422	1	2	3	13
Biological Process	GO:0009259	ribonucleotide metabolic process	0.260629634	0.553778195	0	10	10	58
Biological Process	GO:0019693	ribose phosphate metabolic process	0.260629634	0.553778195	0	10	10	58
Biological Process	GO:0019752	carboxylic acid metabolic process	0.264738726	0.561478838	54	72	126	877
Molecular Function	GO:0015604	organic phosphonate transmembrane transporter activity	0.180025804	0.563414091	0	3	3	11
Biological Process	GO:0009605	response to external stimulus	0.272213529	0.576276539	24	35	59	400
Biological Process	GO:0072524	pyridine-containing compound metabolic process	0.275107558	0.580175806	0	13	13	79
Biological Process	GO:0019321	pentose metabolic process	0.275614731	0.580175806	4	1	5	26
Biological Process	GO:0006164	purine nucleotide biosynthetic process	0.276560488	0.580175806	0	7	7	39
Biological Process	GO:0009152	purine ribonucleotide biosynthetic process	0.276560488	0.580175806	0	7	7	39
Biological Process	GO:0019751	polyol metabolic process	0.276560488	0.580175806	1	6	7	39
Molecular Function	GO:0008080	N-acetyltransferase activity	0.19121011	0.581044986	2	0	2	6
Molecular Function	GO:0016886	ligase activity, forming phosphoric ester bonds	0.19121011	0.581044986	0	2	2	6
Molecular Function	GO:0016857	racemase and epimerase activity, acting on carbohydrates and derivatives	0.192030885	0.581044986	4	0	4	17
Molecular Function	GO:0004871	signal transducer activity	0.192535617	0.581044986	5	9	14	80
Molecular Function	GO:0016628	oxidoreductase activity, acting on the CH-CH group of donors, NAD or NADP as acceptor	0.197552096	0.590908038	6	19	25	154
Biological Process	GO:0034285	response to disaccharide	0.285240656	0.596225054	2	6	8	46
Biological Process	GO:0072522	purine-containing compound biosynthetic process	0.285240656	0.596225054	0	8	8	46
Molecular Function	GO:0016887	ATPase activity	0.201276071	0.596765895	3	24	27	168
Biological Process	GO:0009966	regulation of signal transduction	0.289533863	0.603021967	1	5	6	33
Biological Process	GO:0023051	regulation of signaling	0.289533863	0.603021967	1	5	6	33
Biological Process	GO:0006813	potassium ion transport	0.299317755	0.615648243	0	2	2	8
Biological Process	GO:0009629	response to gravity	0.299317755	0.615648243	0	2	2	8
Biological Process	GO:0009808	lignin metabolic process	0.299317755	0.615648243	2	0	2	8
Biological Process	GO:0042545	cell wall modification	0.299317755	0.615648243	1	1	2	8
Biological Process	GO:0051495	positive regulation of cytoskeleton organization	0.299317755	0.615648243	2	0	2	8
Biological Process	GO:0071804	cellular potassium ion transport	0.299317755	0.615648243	0	2	2	8
Biological Process	GO:0071805	potassium ion transmembrane transport	0.299317755	0.615648243	0	2	2	8
Biological Process	GO:1901607	alpha-amino acid biosynthetic process	0.303641756	0.622333713	1	4	5	27
Biological Process	GO:0009642	response to light intensity	0.304180382	0.622333713	10	2	12	74
Biological Process	GO:0046496	nicotinamide nucleotide metabolic process	0.304180382	0.622333713	0	12	12	74
Biological Process	GO:0007059	chromosome segregation	0.306304157	0.62557357	0	8	8	47
Molecular Function	GO:0016831	carboxy-lyase activity	0.21603481	0.625701105	4	2	6	30
Molecular Function	GO:0070546	L-phenylalanine aminotransferase activity	0.217179373	0.625701105	1	2	3	12
Molecular Function	GO:0019842	vitamin binding	0.220421879	0.625701105	0	5	5	24
Molecular Function	GO:0016772	transferase activity, transferring phosphorus-containing groups	0.226702005	0.625701105	57	113	170	1186
Molecular Function	GO:0042623	ATPase activity, coupled	0.227875618	0.625701105	2	24	26	164
Molecular Function	GO:0051213	dioxygenase activity	0.231367518	0.625701105	0	7	7	37
Molecular Function	GO:0052689	carboxylic ester hydrolase activity	0.233354889	0.625701105	4	5	9	50
Molecular Function	GO:0016879	ligase activity, forming carbon-nitrogen bonds	0.241379488	0.625701105	0	10	10	57
Molecular Function	GO:0004611	phosphoenolpyruvate carboxykinase activity	0.244681314	0.625701105	0	2	2	7
Molecular Function	GO:0004857	enzyme inhibitor activity	0.244681314	0.625701105	2	0	2	7
Molecular Function	GO:0015103	inorganic anion transmembrane transporter activity	0.247029994	0.625701105	4	1	5	25
Molecular Function	GO:0004712	protein serine/threonine/tyrosine kinase activity	0.253612578	0.625701105	0	1	1	2
Molecular Function	GO:0005363	maltose transmembrane transporter activity	0.253612578	0.625701105	0	1	1	2
Molecular Function	GO:0015171	amino acid transmembrane transporter activity	0.253612578	0.625701105	1	0	1	2
Molecular Function	GO:0015562	efflux transmembrane transporter activity	0.253612578	0.625701105	0	1	1	2
Molecular Function	GO:0015563	uptake transmembrane transporter activity	0.253612578	0.625701105	1	0	1	2
Molecular Function	GO:0016538	cyclin-dependent protein serine/threonine kinase regulator activity	0.253612578	0.625701105	0	1	1	2
Molecular Function	GO:0016781	phosphotransferase activity, paired acceptors	0.253612578	0.625701105	0	1	1	2
Molecular Function	GO:0050734	hydroxycinnamoyltransferase activity	0.253612578	0.625701105	1	0	1	2
Molecular Function	GO:0050737	O-hydroxycinnamoyltransferase activity	0.253612578	0.625701105	1	0	1	2
Molecular Function	GO:0051002	ligase activity, forming nitrogen-metal bonds	0.253612578	0.625701105	1	0	1	2
Molecular Function	GO:0051003	ligase activity, forming nitrogen-metal bonds, forming coordination complexes	0.253612578	0.625701105	1	0	1	2
Molecular Function	GO:0070529	L-tryptophan aminotransferase activity	0.253612578	0.625701105	0	1	1	2
Biological Process	GO:0043412	macromolecule modification	0.309360182	0.630702624	44	130	174	1233
Biological Process	GO:0048608	reproductive structure development	0.314622623	0.637943673	7	19	26	172
Biological Process	GO:0061458	reproductive system development	0.314622623	0.637943673	7	19	26	172
Biological Process	GO:0009069	serine family amino acid metabolic process	0.314718567	0.637943673	5	1	6	34
Biological Process	GO:0043170	macromolecule metabolic process	0.315115528	0.637943673	158	324	482	3479
Molecular Function	GO:0022804	active transmembrane transporter activity	0.260597326	0.638274611	10	21	31	202
Biological Process	GO:0009850	auxin metabolic process	0.319034965	0.644751291	1	3	4	21
Biological Process	GO:0051186	cofactor metabolic process	0.32015395	0.645885496	9	26	35	236
Biological Process	GO:0006955	immune response	0.32431717	0.649044208	9	5	14	89
Biological Process	GO:0009743	response to carbohydrate	0.32431717	0.649044208	2	12	14	89
Biological Process	GO:0045087	innate immune response	0.32431717	0.649044208	9	5	14	89
Biological Process	GO:0048367	shoot system development	0.325768816	0.649044208	7	19	26	173
Biological Process	GO:0009756	carbohydrate mediated signaling	0.332064422	0.649044208	0	5	5	28
Biological Process	GO:0010087	phloem or xylem histogenesis	0.332064422	0.649044208	3	2	5	28
Biological Process	GO:0042886	amide transport	0.332064422	0.649044208	2	3	5	28
Biological Process	GO:0071322	cellular response to carbohydrate stimulus	0.332064422	0.649044208	0	5	5	28
Biological Process	GO:0097659	nucleic acid-templated transcription	0.334198588	0.649044208	16	24	40	273
Biological Process	GO:0000723	telomere maintenance	0.335720815	0.649044208	0	3	3	15
Biological Process	GO:0006213	pyrimidine nucleoside metabolic process	0.335720815	0.649044208	0	3	3	15
Biological Process	GO:0006568	tryptophan metabolic process	0.335720815	0.649044208	1	2	3	15
Biological Process	GO:0031347	regulation of defense response	0.335720815	0.649044208	2	1	3	15
Biological Process	GO:0032200	telomere organization	0.335720815	0.649044208	0	3	3	15
Biological Process	GO:0046131	pyrimidine ribonucleoside metabolic process	0.335720815	0.649044208	0	3	3	15
Biological Process	GO:0050832	defense response to fungus	0.335720815	0.649044208	1	2	3	15
Biological Process	GO:0006468	protein phosphorylation	0.336311052	0.649044208	11	16	27	181
Biological Process	GO:0019362	pyridine nucleotide metabolic process	0.338156706	0.649044208	0	12	12	76
Biological Process	GO:0009314	response to radiation	0.338620749	0.649044208	16	28	44	302
Biological Process	GO:0036211	protein modification process	0.339419367	0.649044208	44	115	159	1131
Biological Process	GO:0009790	embryo development	0.345629515	0.649044208	1	6	7	42
Biological Process	GO:0009814	defense response, incompatible interaction	0.349310596	0.649044208	6	2	8	49
Biological Process	GO:0006753	nucleoside phosphate metabolic process	0.350337704	0.649044208	6	28	34	232
Biological Process	GO:0009117	nucleotide metabolic process	0.351527353	0.649044208	5	28	33	225
Biological Process	GO:0009737	response to abscisic acid	0.351907917	0.649044208	0	4	4	22
Biological Process	GO:0097305	response to alcohol	0.351907917	0.649044208	0	4	4	22
Biological Process	GO:0006206	pyrimidine nucleobase metabolic process	0.352628255	0.649044208	1	1	2	9
Biological Process	GO:0006536	glutamate metabolic process	0.352628255	0.649044208	2	0	2	9
Biological Process	GO:0008064	regulation of actin polymerization or depolymerization	0.352628255	0.649044208	2	0	2	9
Biological Process	GO:0016485	protein processing	0.352628255	0.649044208	1	1	2	9
Biological Process	GO:0030041	actin filament polymerization	0.352628255	0.649044208	2	0	2	9
Biological Process	GO:0030832	regulation of actin filament length	0.352628255	0.649044208	2	0	2	9
Biological Process	GO:0030833	regulation of actin filament polymerization	0.352628255	0.649044208	2	0	2	9
Biological Process	GO:0032271	regulation of protein polymerization	0.352628255	0.649044208	2	0	2	9
Biological Process	GO:0032956	regulation of actin cytoskeleton organization	0.352628255	0.649044208	2	0	2	9
Biological Process	GO:0043254	regulation of protein complex assembly	0.352628255	0.649044208	2	0	2	9
Biological Process	GO:0051258	protein polymerization	0.352628255	0.649044208	2	0	2	9
Biological Process	GO:0051604	protein maturation	0.352628255	0.649044208	1	1	2	9
Biological Process	GO:0000038	very long-chain fatty acid metabolic process	0.355704207	0.649044208	1	0	1	3
Biological Process	GO:0006072	glycerol-3-phosphate metabolic process	0.355704207	0.649044208	0	1	1	3
Biological Process	GO:0006833	water transport	0.355704207	0.649044208	0	1	1	3
Biological Process	GO:0007155	cell adhesion	0.355704207	0.649044208	0	1	1	3
Biological Process	GO:0007167	enzyme linked receptor protein signaling pathway	0.355704207	0.649044208	0	1	1	3
Biological Process	GO:0008614	pyridoxine metabolic process	0.355704207	0.649044208	0	1	1	3
Biological Process	GO:0009688	abscisic acid biosynthetic process	0.355704207	0.649044208	1	0	1	3
Biological Process	GO:0009718	anthocyanin-containing compound biosynthetic process	0.355704207	0.649044208	0	1	1	3
Biological Process	GO:0009723	response to ethylene	0.355704207	0.649044208	0	1	1	3
Biological Process	GO:0009873	ethylene-activated signaling pathway	0.355704207	0.649044208	0	1	1	3
Biological Process	GO:0010115	regulation of abscisic acid biosynthetic process	0.355704207	0.649044208	1	0	1	3
Biological Process	GO:0015840	urea transport	0.355704207	0.649044208	0	1	1	3
Biological Process	GO:0019395	fatty acid oxidation	0.355704207	0.649044208	0	1	1	3
Biological Process	GO:0019632	shikimate metabolic process	0.355704207	0.649044208	1	0	1	3
Biological Process	GO:0019755	one-carbon compound transport	0.355704207	0.649044208	0	1	1	3
Biological Process	GO:0034440	lipid oxidation	0.355704207	0.649044208	0	1	1	3
Biological Process	GO:0042816	vitamin B6 metabolic process	0.355704207	0.649044208	0	1	1	3
Biological Process	GO:0043289	apocarotenoid biosynthetic process	0.355704207	0.649044208	1	0	1	3
Biological Process	GO:0043455	regulation of secondary metabolic process	0.355704207	0.649044208	1	0	1	3
Biological Process	GO:0046283	anthocyanin-containing compound metabolic process	0.355704207	0.649044208	0	1	1	3
Biological Process	GO:0071369	cellular response to ethylene stimulus	0.355704207	0.649044208	0	1	1	3
Biological Process	GO:1902645	tertiary alcohol biosynthetic process	0.355704207	0.649044208	1	0	1	3
Biological Process	GO:0042743	hydrogen peroxide metabolic process	0.355909389	0.649044208	6	8	14	91
Biological Process	GO:0044281	small molecule metabolic process	0.35741242	0.65076035	67	108	175	1251
Biological Process	GO:0006820	anion transport	0.361000181	0.656260925	12	13	25	169
Molecular Function	GO:0016709	oxidoreductase activity, acting on paired donors, with incorporation or reduction of molecular oxygen, NAD(P)H as one donor, and incorporation of one atom of oxygen	0.270755753	0.658384492	6	3	9	52
Biological Process	GO:0006464	cellular protein modification process	0.364372795	0.661353757	44	114	158	1129
Biological Process	GO:0040008	regulation of growth	0.365934189	0.663148343	0	6	6	36
Molecular Function	GO:0004497	monooxygenase activity	0.27619673	0.66681782	9	5	14	86
Biological Process	GO:0009658	chloroplast organization	0.369143562	0.667919133	0	7	7	43
Biological Process	GO:0006952	defense response	0.371362358	0.670885508	16	10	26	177
Biological Process	GO:0055076	transition metal ion homeostasis	0.375326787	0.675938444	3	0	3	16
Biological Process	GO:0060249	anatomical structure homeostasis	0.375326787	0.675938444	0	3	3	16
Molecular Function	GO:0016407	acetyltransferase activity	0.285327946	0.683977629	4	0	4	20
Molecular Function	GO:0016160	amylase activity	0.295048277	0.686542341	2	1	3	14
Molecular Function	GO:0035250	UDP-galactosyltransferase activity	0.295048277	0.686542341	1	2	3	14
Molecular Function	GO:0016408	C-acyltransferase activity	0.298584983	0.686542341	0	2	2	8
Molecular Function	GO:0016410	N-acyltransferase activity	0.298584983	0.686542341	2	0	2	8
Molecular Function	GO:0016838	carbon-oxygen lyase activity, acting on phosphates	0.298584983	0.686542341	2	0	2	8
Molecular Function	GO:0016878	acid-thiol ligase activity	0.298584983	0.686542341	0	2	2	8
Biological Process	GO:0019637	organophosphate metabolic process	0.390627988	0.702402501	9	45	54	380
Biological Process	GO:0006633	fatty acid biosynthetic process	0.392998204	0.705568869	3	5	8	51
Biological Process	GO:1901615	organic hydroxy compound metabolic process	0.396525589	0.71079974	8	17	25	172
Molecular Function	GO:0016874	ligase activity	0.311662986	0.711770873	4	21	25	165
Biological Process	GO:0006730	one-carbon metabolic process	0.40443463	0.712839119	2	0	2	10
Biological Process	GO:0007126	meiotic nuclear division	0.40443463	0.712839119	0	2	2	10
Biological Process	GO:0009147	pyrimidine nucleoside triphosphate metabolic process	0.40443463	0.712839119	0	2	2	10
Biological Process	GO:0009148	pyrimidine nucleoside triphosphate biosynthetic process	0.40443463	0.712839119	0	2	2	10
Biological Process	GO:0009208	pyrimidine ribonucleoside triphosphate metabolic process	0.40443463	0.712839119	0	2	2	10
Biological Process	GO:0009209	pyrimidine ribonucleoside triphosphate biosynthetic process	0.40443463	0.712839119	0	2	2	10
Biological Process	GO:0015696	ammonium transport	0.40443463	0.712839119	0	2	2	10
Biological Process	GO:0032970	regulation of actin filament-based process	0.40443463	0.712839119	2	0	2	10
Biological Process	GO:0044087	regulation of cellular component biogenesis	0.40443463	0.712839119	2	0	2	10
Biological Process	GO:0046112	nucleobase biosynthetic process	0.40443463	0.712839119	1	1	2	10
Biological Process	GO:0051302	regulation of cell division	0.40443463	0.712839119	1	1	2	10
Cellular Component	GO:0009534	chloroplast thylakoid	0.180257718	0.715729175	0	2	2	6
Biological Process	GO:0016310	phosphorylation	0.406806832	0.715930564	15	21	36	252
Biological Process	GO:0000003	reproduction	0.411391651	0.722900655	14	54	68	484
Biological Process	GO:0006586	indolalkylamine metabolic process	0.414426489	0.725794542	1	2	3	17
Biological Process	GO:0009225	nucleotide-sugar metabolic process	0.414426489	0.725794542	2	1	3	17
Biological Process	GO:0006575	cellular modified amino acid metabolic process	0.414918814	0.725794542	4	4	8	52
Biological Process	GO:0006865	amino acid transport	0.417451933	0.72912419	2	2	4	24
Biological Process	GO:0006351	transcription, DNA-templated	0.422141948	0.736205385	14	24	38	268
Biological Process	GO:0006778	porphyrin-containing compound metabolic process	0.425483538	0.739028527	6	6	12	81
Biological Process	GO:0033013	tetrapyrrole metabolic process	0.425483538	0.739028527	6	6	12	81
Biological Process	GO:0009416	response to light stimulus	0.427191778	0.739028527	16	24	40	283
Biological Process	GO:0007165	signal transduction	0.432500491	0.739028527	27	34	61	436
Biological Process	GO:0009150	purine ribonucleotide metabolic process	0.439897123	0.739028527	0	7	7	46
Biological Process	GO:0042445	hormone metabolic process	0.443104783	0.739028527	2	4	6	39
Biological Process	GO:0001708	cell fate specification	0.443544755	0.739028527	0	1	1	4
Biological Process	GO:0006071	glycerol metabolic process	0.443544755	0.739028527	1	0	1	4
Biological Process	GO:0006473	protein acetylation	0.443544755	0.739028527	0	1	1	4
Biological Process	GO:0006475	internal protein amino acid acetylation	0.443544755	0.739028527	0	1	1	4
Biological Process	GO:0007349	cellularization	0.443544755	0.739028527	0	1	1	4
Biological Process	GO:0009084	glutamine family amino acid biosynthetic process	0.443544755	0.739028527	1	0	1	4
Biological Process	GO:0009827	plant-type cell wall modification	0.443544755	0.739028527	1	0	1	4
Biological Process	GO:0010118	stomatal movement	0.443544755	0.739028527	1	0	1	4
Biological Process	GO:0010506	regulation of autophagy	0.443544755	0.739028527	1	0	1	4
Biological Process	GO:0010639	negative regulation of organelle organization	0.443544755	0.739028527	0	1	1	4
Biological Process	GO:0010928	regulation of auxin mediated signaling pathway	0.443544755	0.739028527	0	1	1	4
Biological Process	GO:0016573	histone acetylation	0.443544755	0.739028527	0	1	1	4
Biological Process	GO:0018342	protein prenylation	0.443544755	0.739028527	0	1	1	4
Biological Process	GO:0018393	internal peptidyl-lysine acetylation	0.443544755	0.739028527	0	1	1	4
Biological Process	GO:0018394	peptidyl-lysine acetylation	0.443544755	0.739028527	0	1	1	4
Biological Process	GO:0031056	regulation of histone modification	0.443544755	0.739028527	0	1	1	4
Biological Process	GO:0042439	ethanolamine-containing compound metabolic process	0.443544755	0.739028527	0	1	1	4
Biological Process	GO:0043086	negative regulation of catalytic activity	0.443544755	0.739028527	0	1	1	4
Biological Process	GO:0043543	protein acylation	0.443544755	0.739028527	0	1	1	4
Biological Process	GO:0051129	negative regulation of cellular component organization	0.443544755	0.739028527	0	1	1	4
Biological Process	GO:0052386	cell wall thickening	0.443544755	0.739028527	0	1	1	4
Biological Process	GO:0097354	prenylation	0.443544755	0.739028527	0	1	1	4
Biological Process	GO:1902275	regulation of chromatin organization	0.443544755	0.739028527	0	1	1	4
Biological Process	GO:1902930	regulation of alcohol biosynthetic process	0.443544755	0.739028527	1	0	1	4
Biological Process	GO:1903308	regulation of chromatin modification	0.443544755	0.739028527	0	1	1	4
Biological Process	GO:0009555	pollen development	0.446399696	0.741760674	3	2	5	32
Biological Process	GO:1901657	glycosyl compound metabolic process	0.446573174	0.741760674	2	9	11	75
Biological Process	GO:0006401	RNA catabolic process	0.449697399	0.741760674	1	3	4	25
Biological Process	GO:0009081	branched-chain amino acid metabolic process	0.449697399	0.741760674	0	4	4	25
Biological Process	GO:0009628	response to abiotic stimulus	0.44992378	0.741760674	30	44	74	533
Biological Process	GO:0098542	defense response to other organism	0.450295345	0.741760674	6	4	10	68
Biological Process	GO:0009683	indoleacetic acid metabolic process	0.452703982	0.741760674	1	2	3	18
Biological Process	GO:0009738	abscisic acid-activated signaling pathway	0.452703982	0.741760674	0	3	3	18
Biological Process	GO:0048528	post-embryonic root development	0.452703982	0.741760674	0	3	3	18
Biological Process	GO:0071215	cellular response to abscisic acid stimulus	0.452703982	0.741760674	0	3	3	18
Biological Process	GO:0097306	cellular response to alcohol	0.452703982	0.741760674	0	3	3	18
Biological Process	GO:0006790	sulfur compound metabolic process	0.452871154	0.741760674	12	18	30	213
Biological Process	GO:0009226	nucleotide-sugar biosynthetic process	0.454156816	0.742815809	2	0	2	11
Biological Process	GO:0023052	signaling	0.4557164	0.74326703	27	34	61	439
Biological Process	GO:0044700	single organism signaling	0.4557164	0.74326703	27	34	61	439
Biological Process	GO:0048731	system development	0.45967797	0.74855487	13	36	49	352
Biological Process	GO:0006721	terpenoid metabolic process	0.460611931	0.74855487	6	6	12	83
Biological Process	GO:0000097	sulfur amino acid biosynthetic process	0.460897774	0.74855487	8	8	16	112
Biological Process	GO:0015980	energy derivation by oxidation of organic compounds	0.463275892	0.751363422	1	6	7	47
Biological Process	GO:0006979	response to oxidative stress	0.464920576	0.752976262	8	3	11	76
Molecular Function	GO:0016627	oxidoreductase activity, acting on the CH-CH group of donors	0.332915688	0.753028466	6	21	27	181
Molecular Function	GO:0016405	CoA-ligase activity	0.334709711	0.753028466	0	3	3	15
Molecular Function	GO:0016773	phosphotransferase activity, alcohol group as acceptor	0.337051422	0.753028466	36	50	86	604
Molecular Function	GO:0004672	protein kinase activity	0.33864002	0.753028466	33	47	80	561
Molecular Function	GO:0000009	alpha-1,6-mannosyltransferase activity	0.355187014	0.764670132	0	1	1	3
Molecular Function	GO:0005088	Ras guanyl-nucleotide exchange factor activity	0.355187014	0.764670132	0	1	1	3
Molecular Function	GO:0005372	water transmembrane transporter activity	0.355187014	0.764670132	1	0	1	3
Molecular Function	GO:0015929	hexosaminidase activity	0.355187014	0.764670132	0	1	1	3
Molecular Function	GO:0016289	CoA hydrolase activity	0.355187014	0.764670132	0	1	1	3
Biological Process	GO:0034754	cellular hormone metabolic process	0.474411452	0.767274388	2	3	5	33
Biological Process	GO:0071705	nitrogen compound transport	0.475962799	0.768709792	4	12	16	113
Biological Process	GO:0055086	nucleobase-containing small molecule metabolic process	0.479918024	0.774018205	6	29	35	252
Biological Process	GO:0042430	indole-containing compound metabolic process	0.481348794	0.77416931	2	2	4	26
Biological Process	GO:0046148	pigment biosynthetic process	0.481348794	0.77416931	0	4	4	26
Biological Process	GO:0005982	starch metabolic process	0.48317022	0.776020964	1	10	11	77
Biological Process	GO:0009617	response to bacterium	0.485050484	0.777129524	8	6	14	99
Biological Process	GO:0031047	gene silencing by RNA	0.48642545	0.777129524	1	6	7	48
Biological Process	GO:0022414	reproductive process	0.489602933	0.777129524	13	53	66	480
Biological Process	GO:0005991	trehalose metabolic process	0.489900304	0.777129524	2	1	3	19
Biological Process	GO:0006364	rRNA processing	0.489900304	0.777129524	0	3	3	19
Biological Process	GO:0010260	organ senescence	0.489900304	0.777129524	2	1	3	19
Biological Process	GO:0032958	inositol phosphate biosynthetic process	0.489900304	0.777129524	0	3	3	19
Biological Process	GO:0042254	ribosome biogenesis	0.489900304	0.777129524	0	3	3	19
Biological Process	GO:0046173	polyol biosynthetic process	0.489900304	0.777129524	0	3	3	19
Biological Process	GO:0035194	posttranscriptional gene silencing by RNA	0.493553695	0.781853871	1	5	6	41
Cellular Component	GO:0042170	plastid membrane	0.2034283	0.784652015	4	9	13	77
Biological Process	GO:0006355	regulation of transcription, DNA-templated	0.496688763	0.784673379	9	21	30	217
Biological Process	GO:1903506	regulation of nucleic acid-templated transcription	0.496688763	0.784673379	9	21	30	217
Biological Process	GO:0006544	glycine metabolic process	0.501400527	0.788888329	2	0	2	12
Biological Process	GO:0006549	isoleucine metabolic process	0.501400527	0.788888329	0	2	2	12
Biological Process	GO:0051493	regulation of cytoskeleton organization	0.501400527	0.788888329	2	0	2	12
Molecular Function	GO:0016811	hydrolase activity, acting on carbon-nitrogen (but not peptide) bonds, in linear amides	0.374252058	0.795579848	0	3	3	16
Molecular Function	GO:0016832	aldehyde-lyase activity	0.374252058	0.795579848	1	2	3	16
Biological Process	GO:0002252	immune effector process	0.512254365	0.802693579	1	3	4	27
Biological Process	GO:0042440	pigment metabolic process	0.512254365	0.802693579	0	4	4	27
Biological Process	GO:0048511	rhythmic process	0.512254365	0.802693579	4	0	4	27
Biological Process	GO:0009165	nucleotide biosynthetic process	0.516946414	0.803053376	2	12	14	101
Biological Process	GO:0006793	phosphorus metabolic process	0.518414773	0.803053376	58	132	190	1395
Biological Process	GO:0000398	mRNA splicing, via spliceosome	0.519418807	0.803053376	0	1	1	5
Biological Process	GO:0009593	detection of chemical stimulus	0.519418807	0.803053376	1	0	1	5
Biological Process	GO:0009834	plant-type secondary cell wall biogenesis	0.519418807	0.803053376	1	0	1	5
Biological Process	GO:0015740	C4-dicarboxylate transport	0.519418807	0.803053376	1	0	1	5
Biological Process	GO:0015858	nucleoside transport	0.519418807	0.803053376	0	1	1	5
Biological Process	GO:0044092	negative regulation of molecular function	0.519418807	0.803053376	0	1	1	5
Biological Process	GO:0048017	inositol lipid-mediated signaling	0.519418807	0.803053376	0	1	1	5
Biological Process	GO:0048645	organ formation	0.519418807	0.803053376	1	0	1	5
Biological Process	GO:0006066	alcohol metabolic process	0.523087418	0.807646973	2	11	13	94
Biological Process	GO:0015833	peptide transport	0.52580905	0.810768149	2	1	3	20
Cellular Component	GO:0016020	membrane	0.217179238	0.81369019	114	185	299	2204
Cellular Component	GO:0009526	plastid envelope	0.223011385	0.81369019	8	27	35	234
Biological Process	GO:0030154	cell differentiation	0.530095702	0.816290988	5	17	22	161
Biological Process	GO:0072528	pyrimidine-containing compound biosynthetic process	0.531771115	0.817783468	3	4	7	50
Biological Process	GO:0006720	isoprenoid metabolic process	0.532699407	0.818124554	7	7	14	102
Molecular Function	GO:0008483	transaminase activity	0.387953507	0.818978309	2	3	5	30
Molecular Function	GO:0034062	RNA polymerase activity	0.390105053	0.818978309	2	4	6	37
Biological Process	GO:0000096	sulfur amino acid metabolic process	0.535423181	0.82083486	8	8	16	117
Biological Process	GO:0006796	phosphate-containing compound metabolic process	0.535881826	0.82083486	57	128	185	1362
Biological Process	GO:2001141	regulation of RNA biosynthetic process	0.539986472	0.825290368	9	21	30	221
Biological Process	GO:0009163	nucleoside biosynthetic process	0.542286023	0.825290368	0	4	4	28
Biological Process	GO:0042455	ribonucleoside biosynthetic process	0.542286023	0.825290368	0	4	4	28
Biological Process	GO:0006163	purine nucleotide metabolic process	0.543490595	0.825290368	0	8	8	58
Biological Process	GO:0032787	monocarboxylic acid metabolic process	0.544288485	0.825290368	25	40	65	480
Biological Process	GO:0005977	glycogen metabolic process	0.545917463	0.825290368	0	2	2	13
Biological Process	GO:0006112	energy reserve metabolic process	0.545917463	0.825290368	0	2	2	13
Biological Process	GO:0009787	regulation of abscisic acid-activated signaling pathway	0.545917463	0.825290368	0	2	2	13
Biological Process	GO:0010051	xylem and phloem pattern formation	0.545917463	0.825290368	0	2	2	13
Biological Process	GO:1901419	regulation of response to alcohol	0.545917463	0.825290368	0	2	2	13
Molecular Function	GO:0015491	cation:cation antiporter activity	0.403556291	0.831719672	2	0	2	10
Molecular Function	GO:0016742	hydroxymethyl-, formyl- and related transferase activity	0.403556291	0.831719672	2	0	2	10
Molecular Function	GO:0099516	ion antiporter activity	0.403556291	0.831719672	2	0	2	10
Molecular Function	GO:0005515	protein binding	0.408456313	0.836716569	23	51	74	528
Biological Process	GO:0015711	organic anion transport	0.554508611	0.837185099	5	6	11	81
Molecular Function	GO:0003678	DNA helicase activity	0.413299453	0.84153744	0	3	3	17
Cellular Component	GO:0032993	protein-DNA complex	0.245242225	0.842285142	0	1	1	2
Cellular Component	GO:0034518	RNA cap binding complex	0.245242225	0.842285142	0	1	1	2
Cellular Component	GO:0044435	plastid part	0.249565968	0.842285142	14	55	69	486
Biological Process	GO:0034654	nucleobase-containing compound biosynthetic process	0.563430152	0.849547027	19	37	56	416
Biological Process	GO:0048468	cell development	0.564410376	0.849918355	4	12	16	119
Biological Process	GO:0034655	nucleobase-containing compound catabolic process	0.571338213	0.858228611	1	3	4	29
Biological Process	GO:0072593	reactive oxygen species metabolic process	0.571411277	0.858228611	7	8	15	112
Biological Process	GO:0000302	response to reactive oxygen species	0.572943649	0.859102793	8	1	9	67
Biological Process	GO:0006733	oxidoreduction coenzyme metabolic process	0.579669655	0.859102793	0	12	12	90
Biological Process	GO:0046165	alcohol biosynthetic process	0.58392995	0.859102793	1	7	8	60
Biological Process	GO:0000460	maturation of 5.8S rRNA	0.584955287	0.859102793	0	1	1	6
Biological Process	GO:0006109	regulation of carbohydrate metabolic process	0.584955287	0.859102793	0	1	1	6
Biological Process	GO:0006638	neutral lipid metabolic process	0.584955287	0.859102793	1	0	1	6
Biological Process	GO:0006639	acylglycerol metabolic process	0.584955287	0.859102793	1	0	1	6
Biological Process	GO:0006641	triglyceride metabolic process	0.584955287	0.859102793	1	0	1	6
Biological Process	GO:0006835	dicarboxylic acid transport	0.584955287	0.859102793	1	0	1	6
Biological Process	GO:0009630	gravitropism	0.584955287	0.859102793	0	1	1	6
Biological Process	GO:0009644	response to high light intensity	0.584955287	0.859102793	1	0	1	6
Biological Process	GO:0018208	peptidyl-proline modification	0.584955287	0.859102793	1	0	1	6
Biological Process	GO:0019400	alditol metabolic process	0.584955287	0.859102793	1	0	1	6
Biological Process	GO:0033044	regulation of chromosome organization	0.584955287	0.859102793	0	1	1	6
Biological Process	GO:0048571	long-day photoperiodism	0.584955287	0.859102793	0	1	1	6
Biological Process	GO:0051783	regulation of nuclear division	0.584955287	0.859102793	0	1	1	6
Biological Process	GO:1902531	regulation of intracellular signal transduction	0.584955287	0.859102793	1	0	1	6
Biological Process	GO:0032774	RNA biosynthetic process	0.586755894	0.859102793	16	24	40	300
Biological Process	GO:0022898	regulation of transmembrane transporter activity	0.587572895	0.859102793	0	2	2	14
Biological Process	GO:0032409	regulation of transporter activity	0.587572895	0.859102793	0	2	2	14
Biological Process	GO:0032412	regulation of ion transmembrane transporter activity	0.587572895	0.859102793	0	2	2	14
Molecular Function	GO:0016853	isomerase activity	0.42474057	0.859654568	9	13	22	153
Molecular Function	GO:0005506	iron ion binding	0.442949237	0.860627244	1	0	1	4
Molecular Function	GO:0016730	oxidoreductase activity, acting on iron-sulfur proteins as donors	0.442949237	0.860627244	0	1	1	4
Molecular Function	GO:0016881	acid-amino acid ligase activity	0.442949237	0.860627244	0	1	1	4
Molecular Function	GO:0019201	nucleotide kinase activity	0.442949237	0.860627244	1	0	1	4
Molecular Function	GO:0042887	amide transmembrane transporter activity	0.442949237	0.860627244	0	1	1	4
Molecular Function	GO:0052736	beta-glucanase activity	0.442949237	0.860627244	1	0	1	4
Molecular Function	GO:0051536	iron-sulfur cluster binding	0.448063449	0.860627244	5	5	10	68
Molecular Function	GO:0016854	racemase and epimerase activity	0.44833075	0.860627244	4	0	4	25
Molecular Function	GO:0016679	oxidoreductase activity, acting on diphenols and related substances as donors	0.451536022	0.860627244	2	1	3	18
Molecular Function	GO:0016682	oxidoreductase activity, acting on diphenols and related substances as donors, oxygen as acceptor	0.451536022	0.860627244	2	1	3	18
Molecular Function	GO:0015298	solute:cation antiporter activity	0.453229732	0.860627244	2	0	2	11
Molecular Function	GO:0016747	transferase activity, transferring acyl groups other than amino-acyl groups	0.458142892	0.865096635	8	4	12	83
Biological Process	GO:0051252	regulation of RNA metabolic process	0.592648736	0.865103143	9	21	30	226
Biological Process	GO:0006402	mRNA catabolic process	0.593170894	0.865103143	1	2	3	22
Biological Process	GO:1901293	nucleoside phosphate biosynthetic process	0.5939191	0.865104802	2	12	14	106
Biological Process	GO:0006220	pyrimidine nucleotide metabolic process	0.596560355	0.867860416	3	4	7	53
Biological Process	GO:0006816	calcium ion transport	0.599326522	0.870790605	3	1	4	30
Biological Process	GO:0006637	acyl-CoA metabolic process	0.605455934	0.877494332	1	4	5	38
Biological Process	GO:0035383	thioester metabolic process	0.605455934	0.877494332	1	4	5	38
Molecular Function	GO:0016836	hydro-lyase activity	0.472844571	0.881137076	3	2	5	33
Molecular Function	GO:0019203	carbohydrate phosphatase activity	0.479953995	0.881137076	2	2	4	26
Molecular Function	GO:0032553	ribonucleotide binding	0.488702564	0.881137076	3	0	3	19
Molecular Function	GO:0016409	palmitoyltransferase activity	0.500439804	0.881137076	1	1	2	12
Molecular Function	GO:0016861	intramolecular oxidoreductase activity, interconverting aldoses and ketoses	0.500439804	0.881137076	2	0	2	12
Molecular Function	GO:0019205	nucleobase-containing compound kinase activity	0.500439804	0.881137076	1	1	2	12
Molecular Function	GO:0004713	protein tyrosine kinase activity	0.507380448	0.881137076	3	4	7	49
Molecular Function	GO:0046527	glucosyltransferase activity	0.512591512	0.881137076	3	6	9	64
Molecular Function	GO:0016769	transferase activity, transferring nitrogenous groups	0.516453246	0.881137076	2	4	6	42
Molecular Function	GO:0000975	regulatory region DNA binding	0.518775971	0.881137076	0	1	1	5
Molecular Function	GO:0004557	alpha-galactosidase activity	0.518775971	0.881137076	0	1	1	5
Molecular Function	GO:0004564	beta-fructofuranosidase activity	0.518775971	0.881137076	0	1	1	5
Molecular Function	GO:0004779	sulfate adenylyltransferase activity	0.518775971	0.881137076	0	1	1	5
Molecular Function	GO:0010333	terpene synthase activity	0.518775971	0.881137076	1	0	1	5
Molecular Function	GO:0016229	steroid dehydrogenase activity	0.518775971	0.881137076	1	0	1	5
Molecular Function	GO:0016639	oxidoreductase activity, acting on the CH-NH2 group of donors, NAD or NADP as acceptor	0.518775971	0.881137076	1	0	1	5
Molecular Function	GO:0019840	isoprenoid binding	0.518775971	0.881137076	1	0	1	5
Molecular Function	GO:0030246	carbohydrate binding	0.518775971	0.881137076	0	1	1	5
Molecular Function	GO:0033764	steroid dehydrogenase activity, acting on the CH-OH group of donors, NAD or NADP as acceptor	0.518775971	0.881137076	1	0	1	5
Molecular Function	GO:1901981	phosphatidylinositol phosphate binding	0.518775971	0.881137076	0	1	1	5
Biological Process	GO:0065008	regulation of biological quality	0.62235404	0.897621075	17	23	40	304
Biological Process	GO:1901617	organic hydroxy compound biosynthetic process	0.622593447	0.897621075	1	7	8	62
Biological Process	GO:0007568	aging	0.624428249	0.897621075	2	1	3	23
Biological Process	GO:0030198	extracellular matrix organization	0.624428249	0.897621075	1	2	3	23
Biological Process	GO:0043062	extracellular structure organization	0.624428249	0.897621075	1	2	3	23
Biological Process	GO:0008154	actin polymerization or depolymerization	0.626319369	0.897621075	2	0	2	15
Biological Process	GO:0009690	cytokinin metabolic process	0.626319369	0.897621075	1	1	2	15
Biological Process	GO:0010565	regulation of cellular ketone metabolic process	0.626319369	0.897621075	1	1	2	15
Biological Process	GO:1901661	quinone metabolic process	0.626319369	0.897621075	0	2	2	15
Biological Process	GO:0009799	specification of symmetry	0.629331103	0.900822518	2	3	5	39
Molecular Function	GO:0016209	antioxidant activity	0.540861478	0.902885786	3	1	4	28
Molecular Function	GO:0016706	oxidoreductase activity, acting on paired donors, with incorporation or reduction of molecular oxygen, 2-oxoglutarate as one donor, and incorporation of one atom each of oxygen into both donors	0.540861478	0.902885786	0	4	4	28
Molecular Function	GO:0008509	anion transmembrane transporter activity	0.541447851	0.902885786	5	3	8	58
Molecular Function	GO:0008374	O-acyltransferase activity	0.544936983	0.902885786	2	0	2	13
Molecular Function	GO:0015297	antiporter activity	0.544936983	0.902885786	2	0	2	13
Biological Process	GO:0016441	posttranscriptional gene silencing	0.633074233	0.905061681	1	5	6	47
Biological Process	GO:0009889	regulation of biosynthetic process	0.635279299	0.90709424	14	27	41	313
Biological Process	GO:0005985	sucrose metabolic process	0.641561557	0.907116341	0	1	1	7
Biological Process	GO:0006222	UMP biosynthetic process	0.641561557	0.907116341	0	1	1	7
Biological Process	GO:0006839	mitochondrial transport	0.641561557	0.907116341	0	1	1	7
Biological Process	GO:0009965	leaf morphogenesis	0.641561557	0.907116341	1	0	1	7
Biological Process	GO:0010016	shoot system morphogenesis	0.641561557	0.907116341	1	0	1	7
Biological Process	GO:0043101	purine-containing compound salvage	0.641561557	0.907116341	0	1	1	7
Biological Process	GO:0046049	UMP metabolic process	0.641561557	0.907116341	0	1	1	7
Biological Process	GO:0052646	alditol phosphate metabolic process	0.641561557	0.907116341	0	1	1	7
Cellular Component	GO:0009528	plastid inner membrane	0.283106188	0.910503563	3	3	6	34
Cellular Component	GO:0005819	spindle	0.283267775	0.910503563	0	2	2	8
Biological Process	GO:0006972	hyperosmotic response	0.651869848	0.917780195	4	0	4	32
Biological Process	GO:0042180	cellular ketone metabolic process	0.651869848	0.917780195	1	3	4	32
Biological Process	GO:2000241	regulation of reproductive process	0.651869848	0.917780195	1	3	4	32
Biological Process	GO:0009142	nucleoside triphosphate biosynthetic process	0.653996294	0.917780195	0	3	3	24
Biological Process	GO:0009201	ribonucleoside triphosphate biosynthetic process	0.653996294	0.917780195	0	3	3	24
Biological Process	GO:0055065	metal ion homeostasis	0.653996294	0.917780195	3	0	3	24
Biological Process	GO:0007154	cell communication	0.654651504	0.917780195	31	37	68	518
Molecular Function	GO:0004527	exonuclease activity	0.559045464	0.921743253	0	3	3	21
Molecular Function	GO:0000989	transcription factor activity, transcription factor binding	0.584289143	0.922849208	0	1	1	6
Molecular Function	GO:0001067	regulatory region nucleic acid binding	0.584289143	0.922849208	0	1	1	6
Molecular Function	GO:0003712	transcription cofactor activity	0.584289143	0.922849208	0	1	1	6
Molecular Function	GO:0003779	actin binding	0.584289143	0.922849208	1	0	1	6
Molecular Function	GO:0008172	S-methyltransferase activity	0.584289143	0.922849208	1	0	1	6
Molecular Function	GO:0015205	nucleobase transmembrane transporter activity	0.584289143	0.922849208	0	1	1	6
Molecular Function	GO:0016413	O-acetyltransferase activity	0.584289143	0.922849208	1	0	1	6
Molecular Function	GO:0016713	oxidoreductase activity, acting on paired donors, with incorporation or reduction of molecular oxygen, reduced iron-sulfur protein as one donor, and incorporation of one atom of oxygen	0.584289143	0.922849208	1	0	1	6
Molecular Function	GO:0016884	carbon-nitrogen ligase activity, with glutamine as amido-N-donor	0.584289143	0.922849208	0	1	1	6
Biological Process	GO:0072521	purine-containing compound metabolic process	0.662280728	0.927353183	0	9	9	72
Molecular Function	GO:0016638	oxidoreductase activity, acting on the CH-NH2 group of donors	0.591945118	0.93059279	2	1	3	22
Biological Process	GO:0070838	divalent metal ion transport	0.668686527	0.93406393	6	5	11	88
Biological Process	GO:0072511	divalent inorganic cation transport	0.668686527	0.93406393	6	5	11	88
Biological Process	GO:0006221	pyrimidine nucleotide biosynthetic process	0.674221194	0.939528451	2	4	6	49
Biological Process	GO:0009311	oligosaccharide metabolic process	0.674221194	0.939528451	3	3	6	49
Biological Process	GO:0009668	plastid membrane organization	0.681074365	0.945614804	0	10	10	81
Biological Process	GO:0009141	nucleoside triphosphate metabolic process	0.681855234	0.945614804	0	3	3	25
Biological Process	GO:0009199	ribonucleoside triphosphate metabolic process	0.681855234	0.945614804	0	3	3	25
Biological Process	GO:0030422	production of siRNA involved in RNA interference	0.681855234	0.945614804	1	2	3	25
Biological Process	GO:2000112	regulation of cellular macromolecule biosynthetic process	0.689278398	0.949578607	9	26	35	274
Biological Process	GO:0006826	iron ion transport	0.690453529	0.949578607	0	1	1	8
Biological Process	GO:0006829	zinc II ion transport	0.690453529	0.949578607	1	0	1	8
Biological Process	GO:0006914	autophagy	0.690453529	0.949578607	1	0	1	8
Biological Process	GO:0009132	nucleoside diphosphate metabolic process	0.690453529	0.949578607	0	1	1	8
Biological Process	GO:0015766	disaccharide transport	0.690453529	0.949578607	0	1	1	8
Biological Process	GO:0015772	oligosaccharide transport	0.690453529	0.949578607	0	1	1	8
Biological Process	GO:0009112	nucleobase metabolic process	0.695208647	0.95498412	1	1	2	17
Molecular Function	GO:0019899	enzyme binding	0.620590207	0.958499874	2	6	8	62
Molecular Function	GO:0004683	calmodulin-dependent protein kinase activity	0.625335161	0.958499874	1	1	2	15
Molecular Function	GO:0016820	hydrolase activity, acting on acid anhydrides, catalyzing transmembrane movement of substances	0.630689078	0.958499874	2	8	10	78
Molecular Function	GO:0042626	ATPase activity, coupled to transmembrane movement of substances	0.630689078	0.958499874	2	8	10	78
Molecular Function	GO:0043492	ATPase activity, coupled to movement of substances	0.630689078	0.958499874	2	8	10	78
Molecular Function	GO:0015291	secondary active transmembrane transporter activity	0.635459312	0.958499874	6	5	11	86
Molecular Function	GO:0005085	guanyl-nucleotide exchange factor activity	0.640890448	0.958499874	0	1	1	7
Molecular Function	GO:0016307	phosphatidylinositol phosphate kinase activity	0.640890448	0.958499874	0	1	1	7
Molecular Function	GO:0016846	carbon-sulfur lyase activity	0.640890448	0.958499874	0	1	1	7
Molecular Function	GO:0046030	inositol trisphosphate phosphatase activity	0.640890448	0.958499874	0	1	1	7
Molecular Function	GO:0052743	inositol tetrakisphosphate phosphatase activity	0.640890448	0.958499874	0	1	1	7
Molecular Function	GO:0051540	metal cluster binding	0.651125535	0.963427419	6	5	11	87
Molecular Function	GO:0016746	transferase activity, transferring acyl groups	0.656804275	0.963427419	9	10	19	149
Molecular Function	GO:0004180	carboxypeptidase activity	0.661204176	0.963427419	2	0	2	16
Molecular Function	GO:0043566	structure-specific DNA binding	0.661204176	0.963427419	0	2	2	16
Molecular Function	GO:0070566	adenylyltransferase activity	0.661204176	0.963427419	0	2	2	16
Molecular Function	GO:0016866	intramolecular transferase activity	0.674980106	0.963427419	2	2	4	33
Molecular Function	GO:0031406	carboxylic acid binding	0.674980106	0.963427419	1	3	4	33
Molecular Function	GO:0043177	organic acid binding	0.674980106	0.963427419	1	3	4	33
Molecular Function	GO:0000988	transcription factor activity, protein binding	0.689791229	0.963427419	0	1	1	8
Molecular Function	GO:0015154	disaccharide transmembrane transporter activity	0.689791229	0.963427419	0	1	1	8
Molecular Function	GO:0015157	oligosaccharide transmembrane transporter activity	0.689791229	0.963427419	0	1	1	8
Molecular Function	GO:0016790	thiolester hydrolase activity	0.689791229	0.963427419	0	1	1	8
Molecular Function	GO:0016833	oxo-acid-lyase activity	0.689791229	0.963427419	0	1	1	8
Molecular Function	GO:0019901	protein kinase binding	0.689791229	0.963427419	0	1	1	8
Molecular Function	GO:0030551	cyclic nucleotide binding	0.689791229	0.963427419	0	1	1	8
Molecular Function	GO:0050308	sugar-phosphatase activity	0.689791229	0.963427419	0	1	1	8
Biological Process	GO:0031326	regulation of cellular biosynthetic process	0.703933306	0.965210548	10	27	37	291
Biological Process	GO:0016072	rRNA metabolic process	0.704320305	0.965210548	1	13	14	114
Molecular Function	GO:0016615	malate dehydrogenase activity	0.694258139	0.96567593	1	1	2	17
Biological Process	GO:0016246	RNA interference	0.708008248	0.967973496	1	2	3	26
Biological Process	GO:0046471	phosphatidylglycerol metabolic process	0.708008248	0.967973496	1	2	3	26
Biological Process	GO:1901564	organonitrogen compound metabolic process	0.708997261	0.968182581	47	65	112	857
Biological Process	GO:0009933	meristem structural organization	0.712285882	0.970384767	2	4	6	51
Biological Process	GO:0048532	anatomical structure arrangement	0.712285882	0.970384767	2	4	6	51
Biological Process	GO:0044723	single-organism carbohydrate metabolic process	0.714184988	0.971828692	15	20	35	277
Cellular Component	GO:0005911	cell-cell junction	0.314615746	0.972828871	7	20	27	186
Cellular Component	GO:0005774	vacuolar membrane	0.325072737	0.972828871	1	3	4	22
Cellular Component	GO:0030054	cell junction	0.325176517	0.972828871	7	20	27	187
Cellular Component	GO:0031984	organelle subcompartment	0.33148243	0.972828871	4	18	22	151
Biological Process	GO:0000902	cell morphogenesis	0.71675646	0.974183076	4	10	14	115
Biological Process	GO:0016071	mRNA metabolic process	0.721626646	0.976737653	1	3	4	35
Biological Process	GO:0072657	protein localization to membrane	0.72552173	0.976737653	0	2	2	18
Biological Process	GO:0090150	establishment of protein localization to membrane	0.72552173	0.976737653	0	2	2	18
Biological Process	GO:0044802	single-organism membrane organization	0.726514475	0.976737653	0	12	12	100
Biological Process	GO:1901137	carbohydrate derivative biosynthetic process	0.728829666	0.976737653	4	16	20	163
Biological Process	GO:0003006	developmental process involved in reproduction	0.73148077	0.976737653	11	46	57	447
Biological Process	GO:0009066	aspartate family amino acid metabolic process	0.732477483	0.976737653	1	2	3	27
Biological Process	GO:0006397	mRNA processing	0.732681688	0.976737653	0	1	1	9
Biological Process	GO:0006563	L-serine metabolic process	0.732681688	0.976737653	1	0	1	9
Biological Process	GO:0009129	pyrimidine nucleoside monophosphate metabolic process	0.732681688	0.976737653	0	1	1	9
Biological Process	GO:0009130	pyrimidine nucleoside monophosphate biosynthetic process	0.732681688	0.976737653	0	1	1	9
Biological Process	GO:0009173	pyrimidine ribonucleoside monophosphate metabolic process	0.732681688	0.976737653	0	1	1	9
Biological Process	GO:0009174	pyrimidine ribonucleoside monophosphate biosynthetic process	0.732681688	0.976737653	0	1	1	9
Biological Process	GO:0010075	regulation of meristem growth	0.732681688	0.976737653	0	1	1	9
Biological Process	GO:0035266	meristem growth	0.732681688	0.976737653	0	1	1	9
Biological Process	GO:0048366	leaf development	0.732681688	0.976737653	1	0	1	9
Biological Process	GO:0099402	plant organ development	0.73311334	0.976737653	4	18	22	179
Biological Process	GO:0044271	cellular nitrogen compound biosynthetic process	0.733818444	0.976737653	29	52	81	629
Biological Process	GO:0090407	organophosphate biosynthetic process	0.737031315	0.979887788	3	16	19	156
Molecular Function	GO:0000166	nucleotide binding	0.720611308	0.981860904	9	17	26	209
Molecular Function	GO:1901265	nucleoside phosphate binding	0.720611308	0.981860904	9	17	26	209
Molecular Function	GO:0046983	protein dimerization activity	0.723219862	0.981860904	1	9	10	84
Molecular Function	GO:0004175	endopeptidase activity	0.72405731	0.981860904	2	6	8	68
Molecular Function	GO:0016860	intramolecular oxidoreductase activity	0.724598403	0.981860904	2	0	2	18
Molecular Function	GO:0016301	kinase activity	0.726842265	0.981860904	44	58	102	787
Molecular Function	GO:0003747	translation release factor activity	0.732038307	0.981860904	1	0	1	9
Molecular Function	GO:0008079	translation termination factor activity	0.732038307	0.981860904	1	0	1	9
Molecular Function	GO:0016899	oxidoreductase activity, acting on the CH-OH group of donors, oxygen as acceptor	0.732038307	0.981860904	0	1	1	9
Cellular Component	GO:0030076	light-harvesting complex	0.344320085	0.98267331	1	0	1	3
Cellular Component	GO:0009521	photosystem	0.351594999	0.98267331	5	3	8	51
Cellular Component	GO:0044437	vacuolar part	0.356674016	0.98267331	1	3	4	23
Biological Process	GO:0034470	ncRNA processing	0.7424322	0.985936339	0	4	4	36
Biological Process	GO:0090558	plant epidermis development	0.743431343	0.986132297	3	4	7	61
Biological Process	GO:0010556	regulation of macromolecule biosynthetic process	0.745573872	0.987842727	9	26	35	281
Biological Process	GO:0033043	regulation of organelle organization	0.74718454	0.988845369	2	4	6	53
Biological Process	GO:0005984	disaccharide metabolic process	0.752998201	0.991652983	2	3	5	45
Biological Process	GO:0006665	sphingolipid metabolic process	0.753241897	0.991652983	2	0	2	19
Biological Process	GO:0007166	cell surface receptor signaling pathway	0.753241897	0.991652983	0	2	2	19
Biological Process	GO:0005996	monosaccharide metabolic process	0.753589024	0.991652983	10	6	16	134
Biological Process	GO:0009664	plant-type cell wall organization	0.755300459	0.991652983	2	1	3	28
Biological Process	GO:0009909	regulation of flower development	0.755300459	0.991652983	1	2	3	28
Biological Process	GO:0048831	regulation of shoot system development	0.755300459	0.991652983	1	2	3	28
Cellular Component	GO:0031224	intrinsic component of membrane	0.40465939	1	69	113	182	1364
Cellular Component	GO:0005773	vacuole	0.412537428	1	2	3	5	32
Cellular Component	GO:0009532	plastid stroma	0.413737716	1	7	28	35	255
Cellular Component	GO:1990391	DNA repair complex	0.430408959	1	0	1	1	4
Cellular Component	GO:0044436	thylakoid part	0.430664433	1	6	5	11	77
Cellular Component	GO:0034357	photosynthetic membrane	0.435775415	1	5	3	8	55
Cellular Component	GO:0030684	preribosome	0.480179274	1	0	2	2	12
Cellular Component	GO:0044438	microbody part	0.480179274	1	2	0	2	12
Cellular Component	GO:0044439	peroxisomal part	0.480179274	1	2	0	2	12
Cellular Component	GO:0043234	protein complex	0.489118242	1	12	50	62	468
Cellular Component	GO:0009527	plastid outer membrane	0.565661833	1	0	2	2	14
Cellular Component	GO:0044446	intracellular organelle part	0.571911241	1	28	101	129	993
Cellular Component	GO:0019866	organelle inner membrane	0.587969486	1	6	6	12	94
Cellular Component	GO:0042579	microbody	0.596765806	1	5	3	8	63
Cellular Component	GO:0000229	cytoplasmic chromosome	0.626664914	1	0	1	1	7
Cellular Component	GO:0030964	NADH dehydrogenase complex	0.626664914	1	1	0	1	7
Cellular Component	GO:1990204	oxidoreductase complex	0.626664914	1	1	0	1	7
Cellular Component	GO:0031967	organelle envelope	0.668754381	1	11	30	41	329
Cellular Component	GO:0031975	envelope	0.668754381	1	11	30	41	329
Cellular Component	GO:0000139	Golgi membrane	0.704868779	1	2	0	2	18
Cellular Component	GO:0031968	organelle outer membrane	0.704868779	1	0	2	2	18
Cellular Component	GO:0044425	membrane part	0.714317486	1	72	120	192	1507
Cellular Component	GO:0046930	pore complex	0.718340721	1	0	1	1	9
Cellular Component	GO:0048500	signal recognition particle	0.718340721	1	0	1	1	9
Cellular Component	GO:0005768	endosome	0.759311481	1	0	2	2	20
Cellular Component	GO:0044431	Golgi apparatus part	0.759311481	1	2	0	2	20
Molecular Function	GO:0016641	oxidoreductase activity, acting on the CH-NH2 group of donors, oxygen as acceptor	0.768536309	1	0	1	1	10
Molecular Function	GO:0016776	phosphotransferase activity, phosphate group as acceptor	0.768536309	1	1	0	1	10
Biological Process	GO:0065003	macromolecular complex assembly	0.768717361	1	2	25	27	222
Molecular Function	GO:0016810	hydrolase activity, acting on carbon-nitrogen (but not peptide) bonds	0.768924269	1	2	3	5	46
Biological Process	GO:0006074	(1->3)-beta-D-glucan metabolic process	0.769153584	1	0	1	1	10
Biological Process	GO:0009608	response to symbiont	0.769153584	1	0	1	1	10
Biological Process	GO:0043401	steroid hormone mediated signaling pathway	0.769153584	1	0	1	1	10
Biological Process	GO:0048545	response to steroid hormone	0.769153584	1	0	1	1	10
Biological Process	GO:0048638	regulation of developmental growth	0.769153584	1	0	1	1	10
Biological Process	GO:0071383	cellular response to steroid hormone stimulus	0.769153584	1	0	1	1	10
Biological Process	GO:0071824	protein-DNA complex subunit organization	0.769153584	1	0	1	1	10
Molecular Function	GO:0016614	oxidoreductase activity, acting on CH-OH group of donors	0.774071981	1	7	13	20	168
Biological Process	GO:0009639	response to red or far red light	0.775959918	1	3	8	11	96
Biological Process	GO:0006403	RNA localization	0.776526872	1	0	3	3	29
Biological Process	GO:0034762	regulation of transmembrane transport	0.776526872	1	0	3	3	29
Biological Process	GO:0034765	regulation of ion transmembrane transport	0.776526872	1	0	3	3	29
Biological Process	GO:0043647	inositol phosphate metabolic process	0.776526872	1	0	3	3	29
Biological Process	GO:0050657	nucleic acid transport	0.776526872	1	0	3	3	29
Biological Process	GO:0050658	RNA transport	0.776526872	1	0	3	3	29
Biological Process	GO:0051236	establishment of RNA localization	0.776526872	1	0	3	3	29
Biological Process	GO:0043269	regulation of ion transport	0.778917012	1	2	4	6	55
Biological Process	GO:0009116	nucleoside metabolic process	0.780454238	1	0	4	4	38
Biological Process	GO:0009119	ribonucleoside metabolic process	0.780454238	1	0	4	4	38
Molecular Function	GO:0043168	anion binding	0.781764578	1	6	11	17	145
Cellular Component	GO:0005777	peroxisome	0.783123564	1	2	0	2	21
Cellular Component	GO:0019867	outer membrane	0.783123564	1	0	2	2	21
Molecular Function	GO:0016705	oxidoreductase activity, acting on paired donors, with incorporation or reduction of molecular oxygen	0.78436379	1	14	8	22	185
Biological Process	GO:1901135	carbohydrate derivative metabolic process	0.798412196	1	5	21	26	218
Molecular Function	GO:0022857	transmembrane transporter activity	0.799789198	1	17	42	59	475
Molecular Function	GO:0004470	malic enzyme activity	0.800066966	1	0	1	1	11
Molecular Function	GO:0005244	voltage-gated ion channel activity	0.800066966	1	0	1	1	11
Molecular Function	GO:0016634	oxidoreductase activity, acting on the CH-CH group of donors, oxygen as acceptor	0.800066966	1	0	1	1	11
Molecular Function	GO:0022832	voltage-gated channel activity	0.800066966	1	0	1	1	11
Biological Process	GO:0002682	regulation of immune system process	0.800653261	1	0	1	1	11
Biological Process	GO:0006566	threonine metabolic process	0.800653261	1	0	1	1	11
Biological Process	GO:0006613	cotranslational protein targeting to membrane	0.800653261	1	0	1	1	11
Biological Process	GO:0006897	endocytosis	0.800653261	1	0	1	1	11
Biological Process	GO:0019932	second-messenger-mediated signaling	0.800653261	1	1	0	1	11
Biological Process	GO:0030258	lipid modification	0.800653261	1	0	1	1	11
Biological Process	GO:0010208	pollen wall assembly	0.801484931	1	1	1	2	21
Biological Process	GO:0085029	extracellular matrix assembly	0.801484931	1	1	1	2	21
Molecular Function	GO:0016491	oxidoreductase activity	0.805086692	1	64	74	138	1077
Molecular Function	GO:0005342	organic acid transmembrane transporter activity	0.813478906	1	1	2	3	31
Molecular Function	GO:0046943	carboxylic acid transmembrane transporter activity	0.813478906	1	1	2	3	31
Biological Process	GO:0042044	fluid transport	0.813882935	1	1	3	4	40
Biological Process	GO:0000226	microtubule cytoskeleton organization	0.81443327	1	0	3	3	31
Biological Process	GO:0045333	cellular respiration	0.81443327	1	1	2	3	31
Biological Process	GO:0046488	phosphatidylinositol metabolic process	0.81443327	1	0	3	3	31
Molecular Function	GO:0015036	disulfide oxidoreductase activity	0.81533508	1	4	1	5	49
Molecular Function	GO:0004518	nuclease activity	0.818450118	1	0	8	8	75
Cellular Component	GO:0009536	plastid	0.81965761	1	26	87	113	922
Biological Process	GO:0035966	response to topologically incorrect protein	0.820741632	1	0	6	6	58
Biological Process	GO:0009692	ethylene metabolic process	0.822316335	1	2	0	2	22
Biological Process	GO:0010927	cellular component assembly involved in morphogenesis	0.822316335	1	1	1	2	22
Biological Process	GO:0043449	cellular alkene metabolic process	0.822316335	1	2	0	2	22
Biological Process	GO:1900673	olefin metabolic process	0.822316335	1	2	0	2	22
Biological Process	GO:0072527	pyrimidine-containing compound metabolic process	0.825720716	1	3	4	7	67
Biological Process	GO:0043623	cellular protein complex assembly	0.826091598	1	2	18	20	174
Molecular Function	GO:0005267	potassium channel activity	0.827305799	1	0	1	1	12
Molecular Function	GO:0033218	amide binding	0.827305799	1	1	0	1	12
Molecular Function	GO:0046912	transferase activity, transferring acyl groups, acyl groups converted into alkyl on transfer	0.827305799	1	1	0	1	12
Molecular Function	GO:0046915	transition metal ion transmembrane transporter activity	0.827305799	1	0	1	1	12
Molecular Function	GO:0052745	inositol phosphate phosphatase activity	0.827305799	1	0	1	1	12
Biological Process	GO:0006084	acetyl-CoA metabolic process	0.827858055	1	1	0	1	12
Biological Process	GO:0006457	protein folding	0.827858055	1	0	1	1	12
Biological Process	GO:0006525	arginine metabolic process	0.827858055	1	0	1	1	12
Biological Process	GO:0008643	carbohydrate transport	0.827858055	1	0	1	1	12
Biological Process	GO:0009408	response to heat	0.827858055	1	1	0	1	12
Biological Process	GO:0098655	cation transmembrane transport	0.828966782	1	0	4	4	41
Molecular Function	GO:0046873	metal ion transmembrane transporter activity	0.829038569	1	2	3	5	50
Molecular Function	GO:0008514	organic anion transmembrane transporter activity	0.830340983	1	1	2	3	32
Biological Process	GO:0022610	biological adhesion	0.831250175	1	2	1	3	32
Biological Process	GO:0010038	response to metal ion	0.836563602	1	2	7	9	85
Biological Process	GO:1901566	organonitrogen compound biosynthetic process	0.840244412	1	24	41	65	529
Biological Process	GO:0022607	cellular component assembly	0.840868667	1	3	27	30	256
Biological Process	GO:0032989	cellular component morphogenesis	0.844424652	1	4	12	16	144
Biological Process	GO:0061024	membrane organization	0.844424652	1	3	13	16	144
Biological Process	GO:0006970	response to osmotic stress	0.849322463	1	8	10	18	161
Molecular Function	GO:0004601	peroxidase activity	0.850836534	1	1	0	1	13
Molecular Function	GO:0015079	potassium ion transmembrane transporter activity	0.850836534	1	0	1	1	13
Molecular Function	GO:0016684	oxidoreductase activity, acting on peroxide as acceptor	0.850836534	1	1	0	1	13
Molecular Function	GO:0035091	phosphatidylinositol binding	0.850836534	1	0	1	1	13
Biological Process	GO:0006596	polyamine biosynthetic process	0.851353104	1	1	0	1	13
Biological Process	GO:0009309	amine biosynthetic process	0.851353104	1	1	0	1	13
Biological Process	GO:0042401	cellular biogenic amine biosynthetic process	0.851353104	1	1	0	1	13
Biological Process	GO:0051640	organelle localization	0.851353104	1	1	0	1	13
Biological Process	GO:1901264	carbohydrate derivative transport	0.851353104	1	0	1	1	13
Cellular Component	GO:0012505	endomembrane system	0.851711163	1	3	5	8	81
Biological Process	GO:0009606	tropism	0.855014786	1	1	4	5	52
Biological Process	GO:0070085	glycosylation	0.855014786	1	1	4	5	52
Cellular Component	GO:0044422	organelle part	0.855878958	1	35	112	147	1199
Biological Process	GO:0048827	phyllome development	0.856088961	1	2	2	4	43
Cellular Component	GO:0005794	Golgi apparatus	0.85881464	1	2	0	2	25
Cellular Component	GO:0031977	thylakoid lumen	0.85881464	1	0	2	2	25
Biological Process	GO:0006644	phospholipid metabolic process	0.860919166	1	2	10	12	113
Biological Process	GO:0048869	cellular developmental process	0.863247927	1	8	21	29	252
Biological Process	GO:0019318	hexose metabolic process	0.864316412	1	6	5	11	105
Molecular Function	GO:0016651	oxidoreductase activity, acting on NAD(P)H	0.867319144	1	3	1	4	44
Molecular Function	GO:0016903	oxidoreductase activity, acting on the aldehyde or oxo group of donors	0.867319144	1	3	1	4	44
Biological Process	GO:0009057	macromolecule catabolic process	0.868652768	1	6	22	28	245
Cellular Component	GO:0043229	intracellular organelle	0.870098544	1	106	244	350	2766
Biological Process	GO:0035556	intracellular signal transduction	0.870256526	1	5	9	14	131
Biological Process	GO:0022622	root system development	0.870309065	1	2	6	8	80
Biological Process	GO:0048364	root development	0.870309065	1	2	6	8	80
Molecular Function	GO:0015662	ATPase activity, coupled to transmembrane movement of ions, phosphorylative mechanism	0.871163567	1	0	1	1	14
Biological Process	GO:0006612	protein targeting to membrane	0.871643889	1	0	1	1	14
Biological Process	GO:0006754	ATP biosynthetic process	0.871643889	1	0	1	1	14
Biological Process	GO:0009145	purine nucleoside triphosphate biosynthetic process	0.871643889	1	0	1	1	14
Biological Process	GO:0009206	purine ribonucleoside triphosphate biosynthetic process	0.871643889	1	0	1	1	14
Biological Process	GO:0019827	stem cell population maintenance	0.871643889	1	1	0	1	14
Biological Process	GO:0044403	symbiosis, encompassing mutualism through parasitism	0.871643889	1	0	1	1	14
Biological Process	GO:0044419	interspecies interaction between organisms	0.871643889	1	0	1	1	14
Biological Process	GO:0098727	maintenance of cell number	0.871643889	1	1	0	1	14
Biological Process	GO:0034622	cellular macromolecular complex assembly	0.872103102	1	2	19	21	189
Biological Process	GO:0000160	phosphorelay signal transduction system	0.874044227	1	2	1	3	35
Biological Process	GO:0051049	regulation of transport	0.876243025	1	2	4	6	63
Biological Process	GO:0010053	root epidermal cell differentiation	0.87946107	1	1	3	4	45
Biological Process	GO:0015931	nucleobase-containing compound transport	0.87946107	1	0	4	4	45
Biological Process	GO:0090627	plant epidermal cell differentiation	0.87946107	1	1	3	4	45
Biological Process	GO:0006461	protein complex assembly	0.88239147	1	2	20	22	199
Biological Process	GO:0070918	production of small RNA involved in gene silencing by RNA	0.886008956	1	1	2	3	36
Biological Process	GO:0006605	protein targeting	0.886743202	1	13	10	23	208
Biological Process	GO:0006405	RNA export from nucleus	0.887302212	1	0	2	2	26
Biological Process	GO:0051168	nuclear export	0.887302212	1	0	2	2	26
Molecular Function	GO:0016712	oxidoreductase activity, acting on paired donors, with incorporation or reduction of molecular oxygen, reduced flavin or flavoprotein as one donor, and incorporation of one atom of oxygen	0.888722739	1	1	0	1	15
Molecular Function	GO:0022836	gated channel activity	0.888722739	1	0	1	1	15
Molecular Function	GO:0051119	sugar transmembrane transporter activity	0.888722739	1	0	1	1	15
Biological Process	GO:0009144	purine nucleoside triphosphate metabolic process	0.889167069	1	0	1	1	15
Biological Process	GO:0009205	purine ribonucleoside triphosphate metabolic process	0.889167069	1	0	1	1	15
Biological Process	GO:0016051	carbohydrate biosynthetic process	0.889167069	1	1	0	1	15
Biological Process	GO:0016104	triterpenoid biosynthetic process	0.889167069	1	1	0	1	15
Biological Process	GO:0046034	ATP metabolic process	0.889167069	1	0	1	1	15
Biological Process	GO:0070271	protein complex biogenesis	0.892761314	1	2	20	22	201
Molecular Function	GO:0008238	exopeptidase activity	0.896264985	1	2	1	3	37
Biological Process	GO:0031050	dsRNA fragmentation	0.896947979	1	1	2	3	37
Biological Process	GO:0043331	response to dsRNA	0.896947979	1	1	2	3	37
Biological Process	GO:0071359	cellular response to dsRNA	0.896947979	1	1	2	3	37
Biological Process	GO:1901699	cellular response to nitrogen compound	0.896947979	1	1	2	3	37
Biological Process	GO:0009657	plastid organization	0.899093735	1	1	14	15	144
Biological Process	GO:0030036	actin cytoskeleton organization	0.899466279	1	3	1	4	47
Biological Process	GO:0051235	maintenance of location	0.899688191	1	0	2	2	27
Biological Process	GO:0007010	cytoskeleton organization	0.9017694	1	3	5	8	84
Biological Process	GO:0032879	regulation of localization	0.902048853	1	2	4	6	66
Molecular Function	GO:0042625	ATPase coupled ion transmembrane transporter activity	0.903282923	1	1	4	5	57
Molecular Function	GO:0004888	transmembrane signaling receptor activity	0.903890643	1	0	1	1	16
Molecular Function	GO:0005319	lipid transporter activity	0.903890643	1	0	1	1	16
Molecular Function	GO:0043021	ribonucleoprotein complex binding	0.903890643	1	0	1	1	16
Biological Process	GO:0006722	triterpenoid metabolic process	0.904299844	1	1	0	1	16
Biological Process	GO:0010073	meristem maintenance	0.904299844	1	0	1	1	16
Biological Process	GO:0022904	respiratory electron transport chain	0.904299844	1	1	0	1	16
Biological Process	GO:0042451	purine nucleoside biosynthetic process	0.904299844	1	0	1	1	16
Biological Process	GO:0046129	purine ribonucleoside biosynthetic process	0.904299844	1	0	1	1	16
Biological Process	GO:0006913	nucleocytoplasmic transport	0.906933157	1	0	3	3	38
Biological Process	GO:0051169	nuclear transport	0.906933157	1	0	3	3	38
Molecular Function	GO:0005215	transporter activity	0.907876045	1	21	45	66	557
Biological Process	GO:0009409	response to cold	0.908325519	1	1	3	4	48
Biological Process	GO:0030029	actin filament-based process	0.908325519	1	3	1	4	48
Biological Process	GO:0000904	cell morphogenesis involved in differentiation	0.90856621	1	1	6	7	76
Cellular Component	GO:0043226	organelle	0.909433454	1	108	247	355	2823
Molecular Function	GO:0004620	phospholipase activity	0.910269943	1	2	0	2	28
Molecular Function	GO:0016616	oxidoreductase activity, acting on the CH-OH group of donors, NAD or NADP as acceptor	0.913995099	1	3	5	8	86
Biological Process	GO:0008610	lipid biosynthetic process	0.915523628	1	9	13	22	206
Molecular Function	GO:0015144	carbohydrate transmembrane transporter activity	0.916992675	1	0	1	1	17
Molecular Function	GO:1901476	carbohydrate transporter activity	0.916992675	1	0	1	1	17
Cellular Component	GO:0098588	bounding membrane of organelle	0.917367916	1	3	6	9	99
Biological Process	GO:0009067	aspartate family amino acid biosynthetic process	0.917368044	1	0	1	1	17
Biological Process	GO:0022411	cellular component disassembly	0.917368044	1	1	0	1	17
Biological Process	GO:0032984	macromolecular complex disassembly	0.917368044	1	1	0	1	17
Biological Process	GO:0043241	protein complex disassembly	0.917368044	1	1	0	1	17
Biological Process	GO:0043624	cellular protein complex disassembly	0.917368044	1	1	0	1	17
Molecular Function	GO:0043169	cation binding	0.91903686	1	91	94	185	1478
Biological Process	GO:0008654	phospholipid biosynthetic process	0.920740722	1	1	1	2	29
Biological Process	GO:0034660	ncRNA metabolic process	0.921088203	1	6	18	24	224
Molecular Function	GO:0019829	cation-transporting ATPase activity	0.923356057	1	1	3	4	50
Biological Process	GO:0006497	protein lipidation	0.923988308	1	1	3	4	50
Biological Process	GO:0042157	lipoprotein metabolic process	0.923988308	1	1	3	4	50
Biological Process	GO:0042158	lipoprotein biosynthetic process	0.923988308	1	1	3	4	50
Biological Process	GO:0055080	cation homeostasis	0.924316301	1	3	0	3	40
Biological Process	GO:0098771	inorganic ion homeostasis	0.924316301	1	3	0	3	40
Molecular Function	GO:0005261	cation channel activity	0.928309985	1	0	1	1	18
Molecular Function	GO:0099600	transmembrane receptor activity	0.928309985	1	0	1	1	18
Biological Process	GO:0000375	RNA splicing, via transesterification reactions	0.928653121	1	0	1	1	18
Biological Process	GO:0000377	RNA splicing, via transesterification reactions with bulged adenosine as nucleophile	0.928653121	1	0	1	1	18
Biological Process	GO:0006997	nucleus organization	0.928653121	1	0	1	1	18
Molecular Function	GO:0016298	lipase activity	0.929185112	1	2	0	2	30
Cellular Component	GO:0030119	AP-type membrane coat adaptor complex	0.931282635	1	0	1	1	19
Cellular Component	GO:0098805	whole membrane	0.932492594	1	1	6	7	83
Molecular Function	GO:0060089	molecular transducer activity	0.936648746	1	1	3	4	52
Biological Process	GO:0009414	response to water deprivation	0.937580331	1	2	0	2	31
Molecular Function	GO:0016655	oxidoreductase activity, acting on NAD(P)H, quinone or similar compound as acceptor	0.938085492	1	0	1	1	19
Molecular Function	GO:0035251	UDP-glucosyltransferase activity	0.938192816	1	1	2	3	42
Biological Process	GO:0006801	superoxide metabolic process	0.938398189	1	1	0	1	19
Biological Process	GO:0010035	response to inorganic substance	0.940578176	1	4	7	11	118
Cellular Component	GO:0030659	cytoplasmic vesicle membrane	0.94287773	1	1	1	2	33
Cellular Component	GO:0044433	cytoplasmic vesicle part	0.94287773	1	1	1	2	33
Biological Process	GO:0009266	response to temperature stimulus	0.943349498	1	2	3	5	63
Biological Process	GO:0016042	lipid catabolic process	0.943349498	1	3	2	5	63
Biological Process	GO:0009156	ribonucleoside monophosphate biosynthetic process	0.944669008	1	0	2	2	32
Biological Process	GO:0009415	response to water	0.944669008	1	2	0	2	32
Biological Process	GO:0043038	amino acid activation	0.948258912	1	2	3	5	64
Biological Process	GO:0043039	tRNA aminoacylation	0.948258912	1	2	3	5	64
Biological Process	GO:0019439	aromatic compound catabolic process	0.948295348	1	1	3	4	54
Molecular Function	GO:0016859	cis-trans isomerase activity	0.950063403	1	1	2	3	44
Biological Process	GO:0006498	N-terminal protein lipidation	0.950479127	1	1	2	3	44
Biological Process	GO:0008380	RNA splicing	0.950479127	1	1	2	3	44
Biological Process	GO:0031365	N-terminal protein amino acid modification	0.950479127	1	1	2	3	44
Biological Process	GO:0009161	ribonucleoside monophosphate metabolic process	0.950986976	1	0	2	2	33
Biological Process	GO:0016129	phytosteroid biosynthetic process	0.950986976	1	0	2	2	33
Biological Process	GO:0044765	single-organism transport	0.951118151	1	46	70	116	968
Biological Process	GO:0006399	tRNA metabolic process	0.952458205	1	4	5	9	103
Biological Process	GO:0034220	ion transmembrane transport	0.952458205	1	1	8	9	103
Biological Process	GO:0000041	transition metal ion transport	0.952779522	1	3	2	5	65
Molecular Function	GO:0008135	translation factor activity, RNA binding	0.954565719	1	2	5	7	85
Biological Process	GO:1902578	single-organism localization	0.95530307	1	46	71	117	979
Molecular Function	GO:0016875	ligase activity, forming carbon-oxygen bonds	0.95647627	1	2	3	5	66
Molecular Function	GO:0016876	ligase activity, forming aminoacyl-tRNA and related compounds	0.95647627	1	2	3	5	66
Biological Process	GO:0006101	citrate metabolic process	0.956612421	1	1	1	2	34
Biological Process	GO:0016128	phytosteroid metabolic process	0.956612421	1	0	2	2	34
Biological Process	GO:0072350	tricarboxylic acid metabolic process	0.956612421	1	1	1	2	34
Biological Process	GO:0044270	cellular nitrogen compound catabolic process	0.957564607	1	1	3	4	56
Biological Process	GO:0046700	heterocycle catabolic process	0.957564607	1	1	3	4	56
Biological Process	GO:0006811	ion transport	0.959617633	1	26	33	59	525
Cellular Component	GO:0012506	vesicle membrane	0.959803389	1	1	1	2	36
Cellular Component	GO:0031978	plastid thylakoid lumen	0.960948579	1	0	1	1	23
Molecular Function	GO:0008194	UDP-glycosyltransferase activity	0.961497013	1	3	4	7	87
Biological Process	GO:0009124	nucleoside monophosphate biosynthetic process	0.961616554	1	0	2	2	35
Cellular Component	GO:0044429	mitochondrial part	0.962190097	1	2	3	5	70
Cellular Component	GO:0098796	membrane protein complex	0.963205605	1	6	6	12	139
Molecular Function	GO:0016667	oxidoreductase activity, acting on a sulfur group of donors	0.963865708	1	4	1	5	68
Biological Process	GO:0006886	intracellular protein transport	0.964964734	1	13	13	26	257
Biological Process	GO:1901361	organic cyclic compound catabolic process	0.965276963	1	1	3	4	58
Molecular Function	GO:0005543	phospholipid binding	0.965561644	1	0	1	1	23
Biological Process	GO:0006869	lipid transport	0.965771885	1	0	1	1	23
Biological Process	GO:0009127	purine nucleoside monophosphate biosynthetic process	0.965771885	1	0	1	1	23
Biological Process	GO:0009168	purine ribonucleoside monophosphate biosynthetic process	0.965771885	1	0	1	1	23
Biological Process	GO:0010876	lipid localization	0.965771885	1	0	1	1	23
Biological Process	GO:0046128	purine ribonucleoside metabolic process	0.965771885	1	0	1	1	23
Biological Process	GO:0051606	detection of stimulus	0.965771885	1	1	0	1	23
Biological Process	GO:0009123	nucleoside monophosphate metabolic process	0.966064059	1	0	2	2	36
Biological Process	GO:0032446	protein modification by small protein conjugation	0.96805111	1	4	8	12	136
Biological Process	GO:0009062	fatty acid catabolic process	0.968624221	1	2	2	4	59
Biological Process	GO:0072329	monocarboxylic acid catabolic process	0.968624221	1	2	2	4	59
Biological Process	GO:0034613	cellular protein localization	0.969262256	1	13	14	27	268
Molecular Function	GO:0008289	lipid binding	0.969767395	1	1	1	2	37
Biological Process	GO:0098660	inorganic ion transmembrane transport	0.97001355	1	0	2	2	37
Biological Process	GO:0098662	inorganic cation transmembrane transport	0.97001355	1	0	2	2	37
Biological Process	GO:0044712	single-organism catabolic process	0.970156317	1	3	3	6	80
Molecular Function	GO:0016788	hydrolase activity, acting on ester bonds	0.970249424	1	16	23	39	370
Biological Process	GO:0006766	vitamin metabolic process	0.970449882	1	0	1	1	24
Biological Process	GO:0006767	water-soluble vitamin metabolic process	0.970449882	1	0	1	1	24
Biological Process	GO:0009126	purine nucleoside monophosphate metabolic process	0.970449882	1	0	1	1	24
Biological Process	GO:0009167	purine ribonucleoside monophosphate metabolic process	0.970449882	1	0	1	1	24
Biological Process	GO:0045017	glycerolipid biosynthetic process	0.970449882	1	1	0	1	24
Biological Process	GO:0046474	glycerophospholipid biosynthetic process	0.970449882	1	1	0	1	24
Biological Process	GO:0070727	cellular macromolecule localization	0.970837213	1	13	14	27	269
Biological Process	GO:0046486	glycerolipid metabolic process	0.971263786	1	3	5	8	100
Biological Process	GO:0055085	transmembrane transport	0.971342375	1	1	9	10	119
Biological Process	GO:0010015	root morphogenesis	0.971668415	1	1	3	4	60
Biological Process	GO:0044242	cellular lipid catabolic process	0.971668415	1	2	2	4	60
Cellular Component	GO:0030117	membrane coat	0.97186163	1	0	2	2	39
Cellular Component	GO:0048475	coated membrane	0.97186163	1	0	2	2	39
Biological Process	GO:0006631	fatty acid metabolic process	0.972685239	1	5	14	19	201
Molecular Function	GO:0046914	transition metal ion binding	0.973740586	1	24	34	58	529
Molecular Function	GO:0004812	aminoacyl-tRNA ligase activity	0.974150888	1	1	3	4	61
Cellular Component	GO:0016021	integral component of membrane	0.974447889	1	0	1	1	26
Biological Process	GO:0042278	purine nucleoside metabolic process	0.974489028	1	0	1	1	25
Cellular Component	GO:0031982	vesicle	0.974503116	1	1	2	3	52
Biological Process	GO:1902582	single-organism intracellular transport	0.975916172	1	15	11	26	264
Molecular Function	GO:0043167	ion binding	0.975942724	1	96	107	203	1668
Molecular Function	GO:0005216	ion channel activity	0.97642124	1	0	2	2	39
Molecular Function	GO:0015267	channel activity	0.97642124	1	0	2	2	39
Molecular Function	GO:0022803	passive transmembrane transporter activity	0.97642124	1	0	2	2	39
Molecular Function	GO:0022838	substrate-specific channel activity	0.97642124	1	0	2	2	39
Cellular Component	GO:0005623	cell	0.976449705	1	158	300	458	3650
Cellular Component	GO:0030662	coated vesicle membrane	0.977818182	1	0	1	1	27
Cellular Component	GO:0044464	cell part	0.978033942	1	158	299	457	3645
Biological Process	GO:0006650	glycerophospholipid metabolic process	0.979162333	1	2	5	7	94
Biological Process	GO:0019941	modification-dependent protein catabolic process	0.979890879	1	0	9	9	114
Biological Process	GO:0043632	modification-dependent macromolecule catabolic process	0.979890879	1	0	9	9	114
Cellular Component	GO:0005740	mitochondrial envelope	0.980393118	1	1	1	2	42
Cellular Component	GO:0031966	mitochondrial membrane	0.980393118	1	1	1	2	42
Molecular Function	GO:0038023	signaling receptor activity	0.980850554	1	0	1	1	27
Molecular Function	GO:0044877	macromolecular complex binding	0.980850554	1	0	1	1	27
Biological Process	GO:0048878	chemical homeostasis	0.981115172	1	5	1	6	85
Biological Process	GO:0030001	metal ion transport	0.981678802	1	8	14	22	234
Biological Process	GO:0007031	peroxisome organization	0.981739841	1	2	1	3	53
Biological Process	GO:0016054	organic acid catabolic process	0.98315692	1	2	2	4	65
Biological Process	GO:0046395	carboxylic acid catabolic process	0.98315692	1	2	2	4	65
Biological Process	GO:0007015	actin filament organization	0.983973018	1	2	0	2	42
Biological Process	GO:0044267	cellular protein metabolic process	0.984227751	1	56	126	182	1520
Cellular Component	GO:0043231	intracellular membrane-bounded organelle	0.984295514	1	98	210	308	2540
Biological Process	GO:0044282	small molecule catabolic process	0.984848478	1	2	2	4	66
Molecular Function	GO:0016791	phosphatase activity	0.98489855	1	5	6	11	137
Molecular Function	GO:0070011	peptidase activity, acting on L-amino acid peptides	0.985072385	1	4	15	19	211
Molecular Function	GO:0004872	receptor activity	0.985722176	1	0	1	1	29
Biological Process	GO:0050801	ion homeostasis	0.986377979	1	3	1	4	67
Cellular Component	GO:0005739	mitochondrion	0.986505647	1	2	3	5	81
Cellular Component	GO:0044455	mitochondrial membrane part	0.987406483	1	0	1	1	31
Biological Process	GO:0090305	nucleic acid phosphodiester bond hydrolysis	0.987566234	1	0	2	2	44
Biological Process	GO:0006089	lactate metabolic process	0.987769648	1	1	0	1	30
Cellular Component	GO:0016023	cytoplasmic, membrane-bounded vesicle	0.987963673	1	1	1	2	46
Molecular Function	GO:0004721	phosphoprotein phosphatase activity	0.988328777	1	2	1	3	57
Molecular Function	GO:0022890	inorganic cation transmembrane transporter activity	0.988567804	1	3	6	9	121
Cellular Component	GO:0019012	virion	0.989069209	1	0	1	1	32
Cellular Component	GO:0044423	virion part	0.989069209	1	0	1	1	32
Molecular Function	GO:0015075	ion transmembrane transporter activity	0.989316282	1	9	15	24	261
Cellular Component	GO:0031410	cytoplasmic vesicle	0.989356746	1	1	1	2	47
Biological Process	GO:1901575	organic substance catabolic process	0.989391784	1	8	23	31	322
Biological Process	GO:0009056	catabolic process	0.989451043	1	9	25	34	348
Biological Process	GO:0009267	cellular response to starvation	0.989728867	1	2	1	3	58
Biological Process	GO:0042594	response to starvation	0.989728867	1	2	1	3	58
Biological Process	GO:0071822	protein complex subunit organization	0.990162308	1	3	20	23	253
Biological Process	GO:0044255	cellular lipid metabolic process	0.990191207	1	15	30	45	443
Biological Process	GO:0015672	monovalent inorganic cation transport	0.990290081	1	0	6	6	92
Cellular Component	GO:0031461	cullin-RING ubiquitin ligase complex	0.990512692	1	1	0	1	33
Biological Process	GO:0010608	posttranscriptional regulation of gene expression	0.990533501	1	2	7	9	123
Biological Process	GO:0006418	tRNA aminoacylation for protein translation	0.990859473	1	1	2	3	59
Biological Process	GO:0042592	homeostatic process	0.991010205	1	9	5	14	172
Biological Process	GO:0070647	protein modification by small protein conjugation or removal	0.991332827	1	4	9	13	163
Cellular Component	GO:0031981	nuclear lumen	0.991561046	1	1	2	3	62
Cellular Component	GO:0043233	organelle lumen	0.991561046	1	1	2	3	62
Cellular Component	GO:0070013	intracellular organelle lumen	0.991561046	1	1	2	3	62
Biological Process	GO:0016070	RNA metabolic process	0.991798261	1	22	58	80	736
Biological Process	GO:0031669	cellular response to nutrient levels	0.991869528	1	2	1	3	60
Biological Process	GO:0090501	RNA phosphodiester bond hydrolysis	0.992133809	1	0	1	1	33
Cellular Component	GO:0031988	membrane-bounded vesicle	0.992657365	1	1	1	2	50
Biological Process	GO:0019538	protein metabolic process	0.992761735	1	66	142	208	1748
Biological Process	GO:0009746	response to hexose	0.993210215	1	0	1	1	34
Biological Process	GO:0034284	response to monosaccharide	0.993210215	1	0	1	1	34
Biological Process	GO:0006006	glucose metabolic process	0.993390828	1	1	4	5	85
Biological Process	GO:0010467	gene expression	0.993402135	1	50	106	156	1347
Biological Process	GO:0031667	response to nutrient levels	0.993576043	1	2	1	3	62
Molecular Function	GO:0008324	cation transmembrane transporter activity	0.993702846	1	4	10	14	177
Cellular Component	GO:0030135	coated vesicle	0.993797911	1	0	1	1	36
Biological Process	GO:0006643	membrane lipid metabolic process	0.994249095	1	2	0	2	50
Cellular Component	GO:0005654	nucleoplasm	0.994617592	1	1	0	1	37
Cellular Component	GO:0044451	nucleoplasm part	0.994617592	1	1	0	1	37
Cellular Component	GO:0043227	membrane-bounded organelle	0.994641615	1	100	212	312	2607
Biological Process	GO:0006629	lipid metabolic process	0.994753129	1	20	35	55	540
Biological Process	GO:0006694	steroid biosynthetic process	0.994933329	1	1	2	3	64
Molecular Function	GO:0008233	peptidase activity	0.995050168	1	7	15	22	255
Biological Process	GO:0044265	cellular macromolecule catabolic process	0.99512229	1	1	13	14	180
Molecular Function	GO:0022891	substrate-specific transmembrane transporter activity	0.995288045	1	9	18	27	301
Biological Process	GO:0006812	cation transport	0.995383412	1	14	19	33	354
Cellular Component	GO:0031974	membrane-enclosed lumen	0.995749531	1	1	2	3	68
Molecular Function	GO:0046872	metal ion binding	0.995778132	1	41	49	90	835
Cellular Component	GO:0000151	ubiquitin ligase complex	0.995946649	1	1	0	1	39
Biological Process	GO:0031668	cellular response to extracellular stimulus	0.996010521	1	2	1	3	66
Biological Process	GO:0071496	cellular response to external stimulus	0.996010521	1	2	1	3	66
Cellular Component	GO:0031090	organelle membrane	0.996107642	1	18	29	47	494
Biological Process	GO:0006486	protein glycosylation	0.99623177	1	0	1	1	38
Biological Process	GO:0043413	macromolecule glycosylation	0.99623177	1	0	1	1	38
Biological Process	GO:0071702	organic substance transport	0.996248286	1	21	28	49	496
Biological Process	GO:0009991	response to extracellular stimulus	0.996462047	1	2	1	3	67
Biological Process	GO:0008202	steroid metabolic process	0.996863682	1	1	2	3	68
Biological Process	GO:0051603	proteolysis involved in cellular protein catabolic process	0.996935827	1	0	10	10	146
Biological Process	GO:0006417	regulation of translation	0.997003451	1	0	2	2	55
Biological Process	GO:0034248	regulation of cellular amide metabolic process	0.997003451	1	0	2	2	55
Molecular Function	GO:0042578	phosphoric ester hydrolase activity	0.997072964	1	6	6	12	167
Molecular Function	GO:0003723	RNA binding	0.997132978	1	3	7	10	147
Biological Process	GO:0043604	amide biosynthetic process	0.997160244	1	2	11	13	177
Biological Process	GO:0006873	cellular ion homeostasis	0.997193099	1	0	1	1	40
Biological Process	GO:0009100	glycoprotein metabolic process	0.997193099	1	0	1	1	40
Biological Process	GO:0009101	glycoprotein biosynthetic process	0.997193099	1	0	1	1	40
Biological Process	GO:0055082	cellular chemical homeostasis	0.997193099	1	0	1	1	40
Biological Process	GO:0070646	protein modification by small protein removal	0.997193099	1	0	1	1	40
Biological Process	GO:0045184	establishment of protein localization	0.997283746	1	15	17	32	354
Biological Process	GO:0009451	RNA modification	0.99745411	1	0	5	5	94
Molecular Function	GO:0015077	monovalent inorganic cation transmembrane transporter activity	0.997500928	1	0	3	3	70
Biological Process	GO:0009648	photoperiodism	0.997577525	1	0	1	1	41
Cellular Component	GO:0044428	nuclear part	0.997640265	1	2	2	4	86
Molecular Function	GO:0015078	hydrogen ion transmembrane transporter activity	0.997885937	1	0	1	1	42
Biological Process	GO:0043248	proteasome assembly	0.997909342	1	0	1	1	42
Biological Process	GO:0006396	RNA processing	0.997967439	1	2	10	12	171
Biological Process	GO:0015031	protein transport	0.998005062	1	15	16	31	350
Biological Process	GO:0022613	ribonucleoprotein complex biogenesis	0.998070286	1	0	3	3	72
Biological Process	GO:0043603	cellular amide metabolic process	0.998160698	1	2	13	15	202
Biological Process	GO:0030163	protein catabolic process	0.998214056	1	0	10	10	152
Biological Process	GO:0044257	cellular protein catabolic process	0.998214056	1	0	10	10	152
Biological Process	GO:0015992	proton transport	0.99823042	1	0	2	2	59
Biological Process	GO:0019725	cellular homeostasis	0.998253731	1	4	2	6	109
Cellular Component	GO:0005634	nucleus	0.998307606	1	2	2	4	89
Molecular Function	GO:0005198	structural molecule activity	0.998320975	1	0	5	5	98
Biological Process	GO:1902580	single-organism cellular localization	0.998489493	1	1	2	3	74
Biological Process	GO:0006625	protein targeting to peroxisome	0.998656298	1	1	0	1	45
Biological Process	GO:0043574	peroxisomal transport	0.998656298	1	1	0	1	45
Biological Process	GO:0072662	protein localization to peroxisome	0.998656298	1	1	0	1	45
Biological Process	GO:0072663	establishment of protein localization to peroxisome	0.998656298	1	1	0	1	45
Biological Process	GO:0046907	intracellular transport	0.999151468	1	15	15	30	354
Biological Process	GO:0006818	hydrogen transport	0.99918573	1	1	2	3	79
Biological Process	GO:0051649	establishment of localization in cell	0.999206843	1	15	15	30	355
Molecular Function	GO:0022892	substrate-specific transporter activity	0.999239495	1	9	20	29	347
Biological Process	GO:0051641	cellular localization	0.999292471	1	16	16	32	375
Cellular Component	GO:1990234	transferase complex	0.999360313	1	1	0	1	52
Cellular Component	GO:0032991	macromolecular complex	0.999469947	1	15	65	80	820
Cellular Component	GO:0044424	intracellular part	0.99950222	1	140	275	415	3442
Cellular Component	GO:0005622	intracellular	0.999638521	1	141	276	417	3464
Biological Process	GO:0072594	establishment of protein localization to organelle	0.999643628	1	1	0	1	54
Biological Process	GO:0033365	protein localization to organelle	0.99973471	1	1	0	1	56
Cellular Component	GO:1902494	catalytic complex	0.999735272	1	2	0	2	76
Biological Process	GO:0051234	establishment of localization	0.99985715	1	63	99	162	1497
Biological Process	GO:0006810	transport	0.999862465	1	55	82	137	1296
Biological Process	GO:0006412	translation	0.999868045	1	2	7	9	168
Biological Process	GO:0044248	cellular catabolic process	0.999871924	1	3	16	19	274
Biological Process	GO:0043043	peptide biosynthetic process	0.999880916	1	2	7	9	169
Biological Process	GO:0008104	protein localization	0.999906035	1	17	22	39	469
Biological Process	GO:0006508	proteolysis	0.999944749	1	1	12	13	221
Biological Process	GO:0033036	macromolecule localization	0.99994731	1	17	25	42	505
Biological Process	GO:0006518	peptide metabolic process	0.999948119	1	2	7	9	177
Cellular Component	GO:0044391	ribosomal subunit	0.999950795	1	0	1	1	70
Cellular Component	GO:0005737	cytoplasm	0.999952595	1	57	119	176	1668
Cellular Component	GO:0044444	cytoplasmic part	0.999959348	1	57	116	173	1647
Biological Process	GO:0043094	cellular metabolic compound salvage	0.999966466	1	0	1	1	70
Cellular Component	GO:0005840	ribosome	0.999967925	1	1	1	2	92
Biological Process	GO:0016192	vesicle-mediated transport	0.999986015	1	4	3	7	165
Biological Process	GO:0051179	localization	0.999987292	1	63	101	164	1567
Biological Process	GO:0016482	cytoplasmic transport	0.999993946	1	1	3	4	132
Cellular Component	GO:0030529	intracellular ribonucleoprotein complex	1	1	2	8	10	315
Cellular Component	GO:1990904	ribonucleoprotein complex	1	1	2	8	10	315
Molecular Function	GO:0003674	molecular_function	1	1	427	673	1100	8085
Cellular Component	GO:0005575	cellular_component	1	1	239	423	662	5045
Biological Process	GO:0008150	biological_process	1	1	416	695	1111	8152
